## ARL13B regulates Sonic Hedgehog signaling from outside primary cilia

Eduardo D. Gigante<sup>a,b</sup>, Megan R. Taylor<sup>c</sup>, Anna A. Ivanova<sup>d</sup>, Richard A. Kahn<sup>d</sup>, Tamara Caspary<sup>b</sup>

<sup>a</sup>Neuroscience Graduate Program, <sup>b</sup>Department of Human Genetics, <sup>c</sup>Emory College of Arts and Sciences, <sup>d</sup>Department of Biochemistry, Emory University School of Medicine, Atlanta, GA 30322, USA

Author e-mails: [Eduardo.gigante@emory.edu](mailto:Eduardo.gigante@emory.edu), [meg96taylor@gmail.com](mailto:meg96taylor@gmail.com), [anna.ivanova@emory.edu](mailto:anna.ivanova@emory.edu), [rkahn@emory.edu](mailto:rkahn@emory.edu)

**ORCID ID:** Gigante: 0000-0002-1486-5377, Kahn: 0000-0002-0259-0601, Caspary: 0000-0002-6579-7589

✂**Correspondence:** Tamara Caspary  
[tcaspar@emory.edu](mailto:tcaspar@emory.edu)

## Abstract

1            ARL13B is a regulatory GTPase highly enriched in cilia. Complete loss of *Arl13b*  
2            disrupts cilia architecture, protein trafficking and Sonic hedgehog signaling. To  
3            determine whether ARL13B is required within cilia, we knocked in a cilia-excluded  
4            variant of ARL13B (V358A) and showed it retains all known biochemical function. We  
5            found that ARL13B<sup>V358A</sup> protein was expressed but could not be detected in cilia, even  
6            when retrograde ciliary transport was blocked. We showed *Arl13b*<sup>V358A/V358A</sup> mice are  
7            viable and fertile with normal Shh signal transduction. However, in contrast to wild type  
8            cilia, *Arl13b*<sup>V358A/V358A</sup> cells displayed short cilia and lacked ciliary ARL3 and INPP5E.  
9            These data indicate that ARL13B's role within cilia can be uncoupled from its function  
10           outside of cilia. Furthermore, these data imply that the cilia defects upon complete  
11           absence of ARL13B do not underlie the alterations in Shh transduction, which is  
12           unexpected given the requirement of cilia for Shh transduction.

## Keywords:

ARL13B; Sonic Hedgehog signaling; primary cilia; mouse development

## **Introduction**

13           The Hedgehog (Hh) signaling pathway is essential for embryogenesis in a wide  
14 variety of organisms. Initially discovered in *Drosophila* where there is a single Hh ligand,  
15 the core components of the Hh pathway are conserved in vertebrates (Nusslein-Volhard  
16 et al. 1980). These include the vertebrate Hh receptor Patched1 (Ptch1), the obligate  
17 transducer of the pathway Smoothed (Smo), as well as the Gli transcription factors  
18 (Ci in *Drosophila*) that act as both activators (GliA) and repressors (GliR) to control  
19 target gene transcription (Briscoe et al. 2013). There are three Hh ligands in  
20 vertebrates, Sonic (Shh), Indian (Ihh) and Desert (Dhh), that regulate a multitude of  
21 developmental processes including formation of the limbs and digits, the bones of the  
22 skull and face, and the patterning of the neural tube (Placzek et al. 2018). Diminished  
23 Hh signaling during embryogenesis results in birth defects whereas increased Hh  
24 signaling leads to tumors, highlighting the importance of the pathway and its regulation  
25 (Raleigh et al. 2019).

26           Given the deep homology between invertebrate and vertebrate Hh signaling, the  
27 discovery that primary cilia are required for vertebrate, but not invertebrate, Hh signaling  
28 was unexpected (Huangfu et al. 2003; Huangfu et al. 2006). Vertebrate Hh components  
29 dynamically traffic within primary cilia in response to Hh ligand (Corbit et al. 2005;  
30 Haycraft et al. 2005; Rohatgi et al. 2007). In the absence of ligand, Ptch1 is enriched on  
31 the ciliary membrane and Smo is barely detectable (Corbit et al. 2005; Rohatgi et al.  
32 2007). Furthermore, full length Gli proteins traffic to the ciliary tip and back to the  
33 cytoplasm before being cleaved to their repressor form, which actively shuts down Hh  
34 target gene transcription in the nucleus (Kim et al. 2009; Liu et al. 2005; Wen et al.

35 2010; Humke et al. 2010). In contrast, upon ligand stimulation (Shh, Ihh or Dhh), the  
36 Ptch1 receptor binds the ligand and shuttles out of cilia (Rohatgi et al. 2007).  
37 Subsequently, Smo is enriched in the cilium and is subsequently activated (Kong et al.  
38 2019; Corbit et al. 2005). Activated Smo promotes the processing of full-length Gli  
39 transcription factors into GliA, which turns on target genes (Aza-Blanc et al. 2000; Ruiz i  
40 Altaba 1998). Ablation of cilia results in an absence of GliA and GliR production,  
41 rendering the pathway inert and leading to an absence of transcriptional response  
42 (Huangfu et al. 2005). The dynamic ciliary movement of Shh components appears to be  
43 critical to pathway function, as alterations to cilia disrupt pathway output (Caspary et al.  
44 2007; Huangfu et al. 2006; Liem et al. 2012; Liem et al. 2009; Goetz et al. 2009;  
45 Murdoch et al. 2010; Tuz et al. 2014; Cortellino et al. 2009; Houde et al. 2006; Liu et al.  
46 2005; Tran et al. 2008; Taylor et al. 2015).

47         Given that the fundamental logic of the pathway is conserved from flies through  
48 vertebrates, and that flies transduce Hh signals without relying on primary cilia, both  
49 evolutionary and mechanistic questions are raised as to how vertebrate cells co-opted  
50 the primary cilium for Hh signal transduction. One distinction lies in the fact that  
51 vertebrates use Hh signaling over a longer distance than flies, leading to the proposal  
52 that the primary cilium is a critical part of a mechanism underlying long range signaling  
53 (Bangs et al. 2015). For example, in neural patterning Shh is initially expressed in the  
54 notochord and is secreted to specify fates more than 20 cells away (Chiang et al. 1996;  
55 Briscoe et al. 2001; Roelink et al. 1994). At the evolutionary level, comparisons among  
56 organisms with cilia and or Hh have provided some clues. The round worm *C. elegans*  
57 have cilia yet do not possess Hh signaling as they don't have most of the genes

58 encoding the core components of Hh signal transduction (Consortium 1998; Roy 2012).  
59 Curiously, a few components of Hh signaling such as fused and costal 2 are in the *C.*  
60 *elegans* genome where they are functionally important for ciliogenesis (Ingham et al.  
61 2011). Additionally, *C. elegans* retained a Ptch1 homolog important for development  
62 and pattern formation, but no Hh or Smo (Zugasti et al. 2005; Kuwabara et al. 2000). In  
63 contrast, planaria flatworms possess both cilia and Hh signaling but the cilia are not  
64 required to transduce Hh signaling (Rink et al. 2009). The first known evolutionary link  
65 between cilia and Hh is in sea urchins which transduce Hh signal in developing muscle  
66 tissue via motile cilia (Warner et al. 2014; Sigg et al. 2017). Subsequently, in  
67 vertebrates Hh signaling requires primary cilia. These data suggest that the mechanistic  
68 link of cilia and Hh is limited to deuterostomes and raises the question of whether the  
69 relationship of Hh and primary cilia originated near the last common ancestor of  
70 vertebrates, the urochordates.

71         ARL13B is a member of the ARF family of regulatory GTPases and is highly  
72 enriched on the ciliary membrane (Caspary et al. 2007). In mice, a null mutation of  
73 *Arl13b* leads to short cilia and to alterations in Shh signal transduction (Caspary et al.  
74 2007; Larkins et al. 2011). ARL13 is ancient, predicted to be present in the last common  
75 eukaryotic ancestor. ARL13 appears to have been lost during evolution in organisms  
76 that lack cilia and duplicated to ARL13A and ARL13B in the urochordates, thus ARL13B  
77 is proposed to hold important clues in deciphering the links between primary cilia and  
78 vertebrate Hh signaling (Schlacht et al. 2013; Li et al. 2004; Kahn et al. 2008; East et al.  
79 2012; Logsdon et al. 2004).

80           ARF regulatory GTPases, like ARL13B, are best known to play roles in  
81 membrane trafficking (D'Souza-Schorey et al. 2006). As is true for a large number of  
82 regulatory GTPases, ARL13B is functionally diverse (Sztul et al. 2019). It regulates  
83 endocytic traffic (Barral et al. 2012), as well as the phospholipid composition of the  
84 ciliary membrane through recruitment of the lipid phosphatase INPP5E to the ciliary  
85 membrane (Humbert et al. 2012). ARL13B also has a conserved role as a guanine  
86 nucleotide exchange factor (GEF) for ARL3, another ciliary ARF-like (ARL) protein  
87 (Gotthardt et al. 2015; Zhang et al. 2016; Hanke-Gogokhia et al. 2016; Ivanova et al.  
88 2017). ARL13B regulates intraflagellar transport (IFT), the process that builds and  
89 maintains cilia (Cevik et al. 2010; Li et al. 2010; Nozaki et al. 2017). It is known to  
90 interact with several proteins associated with cilia, including the exocyst, tubulin and  
91 UNC119 (Seixas et al. 2016; Zhang et al. 2016; Larkins et al. 2011; Revenkova et al.  
92 2018). Critical to this work, loss of ARL13B disrupts Shh signal transduction in at least  
93 two distinct ways: Smo enrichment in cilia occurs even in the absence of ligand and Gli  
94 activator production is diminished, although Gli repressor is made normally (Caspary et  
95 al. 2007; Larkins et al. 2011).

96           Due to the high enrichment of ARL13B on the ciliary membrane, ARL13B is  
97 assumed to function in its diverse roles from within the cilium. However, ARL13B is  
98 present in early endosomes and circular dorsal ruffles on the cell surface (Barral et al.  
99 2012; Casalou et al. 2014). We previously showed that a V358A variant of ARL13B  
100 does not localize to cilia as it disrupts a known VxPx cilia localization sequence  
101 (Higginbotham et al. 2012; Mariani et al. 2016). Exogenous overexpression of a  
102 ARL13B<sup>V358A</sup> construct in *Arl13b* null cells does not rescue ARL13B-dependent

103 phenotypes such as cilia length as well as interneuron migration and connectivity,  
104 consistent with ciliary ARL13B mediating these processes (Higginbotham et al. 2012;  
105 Mariani et al. 2016). In contrast, we found that overexpressed ARL13B<sup>V358A</sup> does rescue  
106 the Shh-dependent ciliary enrichment of Smo in mouse embryonic fibroblasts, arguing  
107 that ARL13B may function outside the cilium to regulate Smo traffic (Mariani et al.  
108 2016). Together, these results raise the question of where ARL13B functions.

109 To define where ARL13B functions in relation to cilia, we wanted an *in vivo*  
110 model so generated mice carrying the ARL13B<sup>V358A</sup> point mutation using CRISPR/Cas9.  
111 Here we demonstrate that ARL13B<sup>V358A</sup> protein was undetectable in *Arl13b*<sup>V358A/V358A</sup>  
112 cilia in both neural tube and mouse embryonic fibroblast cilia, even after blocking  
113 retrograde ciliary traffic. We report that *Arl13b*<sup>V358A/V358A</sup> mice were viable, fertile, and  
114 transduced Shh signal normally. We found ARL3 and INPP5E did not localize to the  
115 short cilia present in/on *Arl13b*<sup>V358A/V358A</sup> cells. These data indicate that ARL13B's roles  
116 within and outside cilia can be uncoupled; ARL13B's role in regulating cilia length is  
117 from within cilia, whereas its control of Shh signaling appears to be from outside the  
118 cilium. Thus, these data imply that the cilia defects seen in the complete absence of  
119 ARL13B do not underlie the alterations in Shh transduction, which is unexpected given  
120 the requirement of cilia for Shh signal transduction.

## **Results**

### 121 **ARL13B<sup>V358A</sup> displays normal GEF activity**

122 We previously showed that mouse ARL13B<sup>V358A</sup> protein retained normal intrinsic  
123 and GAP-stimulated GTP hydrolysis activities by analyzing GST-ARL13B<sup>V358A</sup> purified

124 from human embryonic kidney (HEK) cells (Mariani et al. 2016). In order to test  
125 ARL13B<sup>V358A</sup> GEF activity for ARL3, we used the same GST-ARL13B<sup>V358A</sup> protein  
126 preparation and measured the rates of spontaneous or GEF-stimulated GDP  
127 dissociation from ARL3 in the presence and absence of ARL13B or ARL13B<sup>V358A</sup>. ARL3  
128 spontaneously releases pre-bound GDP quite slowly under the conditions in the assay,  
129 though release is linear with time, and by extrapolation requires just under 30 min for  
130 50% of pre-bound [<sup>3</sup>H]GDP to dissociate (**Figure 1**). In marked contrast, addition of  
131 ARL13B under the same conditions caused the release of 50% of the GDP within ~10  
132 seconds and close to 100% in one minute. We detected no differences between the wild  
133 type and mutant ARL13B<sup>V358A</sup> proteins in this assay, consistent with this point mutation  
134 having no effect on ARL13B GEF function (**Figure 1**). This result is consistent with GEF  
135 activity being conserved within the protein's GTPase domain while the V358A mutation  
136 is located in the C-terminal domain (Gotthardt et al. 2015). These data indicate that  
137 ARL13B<sup>V358A</sup> retains all known ARL13B biochemical activities, suggesting that the  
138 V358A mutation only disrupts ARL13B localization.

139

140 ***CRISPR engineered Arl13b<sup>V358A/V358A</sup> mice express cilia-excluded ARL13B protein.***

141 To determine the consequences of ARL13B<sup>V358A</sup> expression *in vivo*, we used  
142 CRISPR/Cas9 editing to change residue 358 from valine to alanine (**Figure 2A**). We  
143 performed sequencing of the region that flanked exon 8, using primers outside the  
144 region of the donor oligonucleotide. We confirmed the heterozygous T to C base pair  
145 change for a valine to alanine change at residue 358 (**Figure 2B**). We backcrossed



146 heterozygous F1 progeny to FVB/NJ for three generations before analysis to minimize  
147 any off target confounds (see details in Methods).

148 To determine whether ARL13B<sup>V358A</sup> was detectable in neural tube cilia, we  
149 performed immunofluorescence using antibodies directed against ARL13B and the cilia  
150 marker IFT88. At embryonic day (E)10.5, we saw IFT88 staining, indicating the  
151 presence of cilia. In neural tube cilia of *Arl13b*<sup>+/+</sup> and *Arl13b*<sup>V358A/+</sup> embryos, we  
152 observed equivalent ARL13B staining but could not see ARL13B signal in neural tube  
153 cilia of *Arl13b*<sup>V358A/V358A</sup> embryos (**Figure 2C**). We exposed the images longer, to  
154 saturation, and while we observed low-level staining throughout the cell, we saw no  
155 ciliary ARL13B indicating the ARL13B<sup>V358A</sup> protein is undetectable in cilia *in vivo* (**Figure**  
156 **2 – Figure supplement 1**).

157 One possible explanation for the absence of ciliary ARL13B in the  
158 *Arl13b*<sup>V358A/V358A</sup> embryos is that the ARL13B<sup>V358A</sup> protein is not expressed or is  
159 unstable. To determine whether ARL13B protein expression was affected by the V358A  
160 mutation, we performed Western blots on E10.5 whole embryo lysates (**Figure 2D**). We  
161 found a ~7% ( $\pm 20\%$ ) reduction of ARL13B levels in *Arl13b*<sup>V358A/+</sup> embryos and a ~37%  
162 ( $\pm 6\%$ ) decrease of ARL13B levels in *Arl13b*<sup>V358A/V358A</sup> embryos, compared to WT  
163 (**Figure 2E**). This decrease may reflect a change in ARL13B<sup>V358A</sup> stability compared to  
164 ciliary ARL13B or could signify ARL13B<sup>V358A</sup> protein having a distinct half-life when  
165 localizing to different cellular compartments. Regardless, these data indicate that  
166 ARL13B<sup>V358A</sup> is expressed in *Arl13b*<sup>V358A/V358A</sup> embryos.

167

168

169 ***ARL13B*<sup>V358A</sup> protein is undetectable in cilia in mouse embryonic fibroblasts.**

170 To more closely investigate whether any *ARL13B*<sup>V358A</sup> protein could localize to  
171 cilia, we generated immortalized mouse embryonic fibroblasts (MEFs). We performed  
172 double labeling to first identify cilia using acetylated  $\alpha$ -tubulin or IFT88 antibodies and  
173 subsequently determined whether *ARL13B* is present in cilia. We used five distinct  
174 antibodies against *ARL13B*: 4 antibodies against amino acids 208-427 of the mouse  
175 *ARL13B* protein (1 mouse monoclonal (NeuroMab), 3 rabbit polyclonal antibodies  
176 (Caspary et al. 2007)), as well as 1 antibody against the full-length human *ARL13B*  
177 protein (rabbit polyclonal (Protein Tech)). By eye, we observed strong ciliary staining of  
178 *ARL13B* with each of the antibodies in *Ar113b*<sup>+/+</sup> and *Ar113b*<sup>V358A/+</sup> cells, but we were  
179 unable to identify any evidence of *ARL13B* staining above background within cilia in  
180 *Ar113b*<sup>V358A/V358A</sup> cells with any of these five antibodies (**Figure 3A**). Taken together,  
181 these data support our conclusion that *ARL13B*<sup>V358A</sup> is not detectable in cilia using the  
182 currently available, validated *ARL13B* antibodies. While we observed no evidence of  
183 detectable ciliary *ARL13B* in *Ar113b*<sup>V358A/V358A</sup> MEFs, it is possible that a small amount of  
184 *ARL13B*<sup>V358A</sup> is constantly trafficking in and out of cilia, at steady-state levels that  
185 remain below the limits of detection. To begin to address this possibility, we blocked  
186 retrograde ciliary transport, reasoning that any *ARL13B* undergoing trafficking in and out  
187 of cilia would accumulate. We treated cells with ciliobrevin-D, which blocks the  
188 retrograde motor protein dynein (Firestone et al. 2012). As a positive control, we  
189 examined IFT88 and Gli3, a ciliary protein and a Hh component, respectively; both are  
190 known to accumulate at ciliary tips upon blocking of retrograde transport. We found  
191 IFT88 and Gli3 enrichment at ciliary tips in *Ar113b*<sup>+/+</sup>, *Ar113b*<sup>V358A/+</sup> and *Ar113b*<sup>V358A/V358A</sup>

192 cells upon ciliobrevin-D treatment relative to the respective DMSO-treated controls with  
193 no difference in IFT88 or Gli3 staining among the 3 genotypes (**Figure 3B and C**). To  
194 determine whether ARL13B accumulated in cilia of ciliobrevin-D-treated MEFs, we  
195 examined cells co-stained for acetylated  $\alpha$ -tubulin and ARL13B. In *Arl13b*<sup>+/+</sup> and  
196 *Arl13b*<sup>V358A/+</sup> cells, we saw that about 90% of acetylated  $\alpha$ -tubulin-positive cilia also  
197 stained for ARL13B in DMSO-treated control or ciliobrevin-D treated MEFs (**Figure 3D**  
198 **and E**). In *Arl13b*<sup>V358A/V358A</sup> MEFs, we saw no ciliary ARL13B staining in DMSO-treated  
199 control or ciliobrevin-D-treated cells using 2 antibodies against distinct epitopes (**Figure**  
200 **3D and E**). Thus, even when retrograde traffic out of cilia is disrupted, we were unable  
201 to detect ARL13B protein in cilia in *Arl13b*<sup>V358A/V358A</sup> MEFs.

202 We re-examined these data and repeated our analyses using over-exposed  
203 images. After defining the region of interest using the acetylated  $\alpha$ -tubulin staining, we  
204 subsequently overexposed the ARL13B channel five-fold relative to the images in  
205 Figure 3 and acquired measurements at the cilium and the cell body (**Figure 3 – Figure**  
206 **supplement 1**). As a control, we used *Arl13b*<sup>hnn/hnn</sup> MEFs, which are devoid of any  
207 ARL13B, and obtained a ratio of 1.0, with or without ciliobrevin-D treatment. We found  
208 the same ratio when we analyzed *Arl13b*<sup>V358A/V358A</sup> MEFs consistent with ARL13B being  
209 absent from the cilia. We observed a few instances of ARL13B appearing to co-localize  
210 with acetylated  $\alpha$ -tubulin, but these were rare (<5%, 2/49) and occurred in both  
211 *Arl13b*<sup>V358A/V358A</sup> and *Arl13b*<sup>hnn/hnn</sup> (null) cells indicating this is the background staining of  
212 the primary antibody. We extended our analysis of overexposed images in  
213 *Arl13b*<sup>V358A/V358A</sup> and *Arl13b*<sup>hnn/hnn</sup> neural tube sections four-fold relative to the images in  
214 Figure 2; we identified no overlap of overexposed ARL13B with cilia marker IFT88

215 **(Figure 2 – Figure supplement 1)**. While it is formally possible that an extremely small  
216 amount of ARL13B<sup>V358A</sup> remains in cilia, we are not able to find evidence of it; thus, we  
217 designate ARL13B<sup>V358A</sup> protein as cilia-excluded ARL13B.

218 We did not observe any obvious cellular ARL13B signal in the cells expressing  
219 cilia-excluded ARL13B so we investigated whether we could detect cellular ARL13B in  
220 cells lacking cilia, *IFT172<sup>wim</sup>* MEFs. As controls we used wildtype, *Arl13b<sup>hnn</sup>* (lacking  
221 ARL13B), and *IFT172<sup>wim</sup> Arl13b<sup>hnn</sup>* (lacking ARL13B and cilia) MEFs. We only detected  
222 ARL13B staining in *IFT172<sup>wim</sup>* cells upon overexposure and found it was modestly  
223 detectable above the background level we observed in *Arl13b<sup>hnn</sup>* or *IFT172<sup>wim</sup> Arl13b<sup>hnn</sup>*  
224 cells **(Figure 3 – Figure supplement 2)**. Thus, cellular ARL13B is expressed at an  
225 extremely low level.

226

***Arl13b<sup>V358A/V358A</sup>* mice are viable and fertile.**

227 In order to determine the phenotypic consequence of the *Arl13b<sup>V358A</sup>* allele, we  
228 intercrossed *Arl13b<sup>V358A/+</sup>* mice. We observed progeny in Mendelian proportions with an  
229 average of 7.3 pups per litter, consistent with the reported FVB/NJ litter size of 7-9  
230 (Murray et al. 2010) **(Table 1)**. To test whether homozygous mice breed normally, we  
231 crossed *Arl13b<sup>V358A/V358A</sup>* males to heterozygous or homozygous females. We found the  
232 *Arl13b<sup>V358A</sup>* allele segregated in Mendelian proportions and the litter sizes were normal  
233 indicating that *Arl13b<sup>V358A</sup>* does not impact viability, fertility or fecundity.

234

235

236

237 **ARL13B<sup>V358A</sup> permits normal embryonic development and Shh signaling.**

238 Loss of *Arl13b* leads to morphologically abnormal embryos, lethality and neural  
239 patterning defects (Caspary et al. 2007). As ARL13B<sup>V358A</sup> overcame the embryonic  
240 lethality, we examined overall embryo morphology at E9.5, E10.5 and E12.5. We found  
241 the overall morphology of *Arl13b*<sup>V358A/V358A</sup> embryos resembled those of *Arl13b*<sup>+/+</sup> and  
242 *Arl13b*<sup>V358A/+</sup> embryos indicating that ARL13B<sup>V358A</sup> did not lead to gross morphological  
243 defects. (**Figure 4A-I**).

244 At E9.5, Shh is normally expressed in the notochord as well as the floor plate of  
245 the ventral neural tube. Moving dorsally, the adjacent domains express Nkx2.2 and  
246 subsequently Olig2. In the *Arl13b*<sup>hnn/hnn</sup> (null) neural tube, the Shh-positive columnar  
247 cells of the floor plate are absent resulting in both ventral and dorsal expansion of  
248 intermediate Shh-dependent cell fates such as Olig2 (Caspary et al. 2007). To  
249 determine whether ARL13B<sup>V358A</sup> disrupts Shh signaling, we examined neural tube  
250 patterning in *Arl13b*<sup>+/+</sup>, *Arl13b*<sup>V358A/+</sup>, and *Arl13b*<sup>V358A/V358A</sup> embryos at E9.5, E10.5, and  
251 E12.5. At E9.5 we observed no differences in Shh, Nkx2.2 or Olig2 among *Arl13b*<sup>+/+</sup>,  
252 *Arl13b*<sup>V358A/+</sup>, and *Arl13b*<sup>V358A/V358A</sup> embryos (**Figure 4A-C**). Cell fates in the neural tube  
253 are specified by both the concentration and duration of Shh signaling so we examined  
254 neural patterning at subsequent stages (Dessaud et al. 2007). By E10.5, some Olig2  
255 precursors have differentiated to HB9+ motor neurons and all Shh-responsive cells  
256 express Nkx6.1. We found that Olig2, HB9 and Nkx6.1 positive cells are normally  
257 distributed in all 3 genotypes at E10.5 and E12.5 (**Figure 4D-I**). These data indicate that  
258 ARL13B<sup>V358A</sup> mediates normal Shh signaling.

259

260 ***ARL13B regulates ciliary enrichment of Shh components from outside cilia.***

261 In *Arl13b<sup>hnn/hnn</sup>* cells, Smo is enriched in cilia in a Shh-independent manner,  
262 which may be due to defective trafficking of Smo, as many ARL family members  
263 regulate protein trafficking (Lim et al. 2011; Larkins et al. 2011). To assess Smo  
264 enrichment in *Arl13b<sup>V358A/V358A</sup>* embryos, we stained for the cilia marker acetylated  $\alpha$ -  
265 tubulin and Smo in E10.5 embryos. Smo appeared enriched normally in ventral floor  
266 plate cilia and the dorsal boundary of Smo ciliary enrichment in ventral neural  
267 progenitors was identical in *Arl13b<sup>+/+</sup>*, *Arl13b<sup>V358A/+</sup>*, and *Arl13b<sup>V358A/V358A</sup>* samples  
268 indicating ARL13B<sup>V358A</sup> mediates normal ciliary Smo enrichment (**Figure 5A**).

269 To examine Smo traffic in response to Shh stimulation, we treated MEFs with  
270 0.5% FBS or Shh-conditioned media for 24 hours and stained for Smo. As expected in  
271 control *Arl13b<sup>hnn/hnn</sup>* cells, we saw ciliary Smo in unstimulated MEFs which increased  
272 upon stimulation with Shh-conditioned media (Larkins et al. 2011) (**Figure 5B**). In  
273 *Arl13b<sup>+/+</sup>*, *Arl13b<sup>V358A/+</sup>*, and *Arl13b<sup>V358A/V358A</sup>* MEF cilia, we saw ciliary enrichment of  
274 Smo upon Shh stimulation over their respective unstimulated controls (**Figure 5B**, left).  
275 We found no difference in Smo enrichment among these cell lines (**Figure 5B**, right).  
276 Thus, despite ARL13B being critical for Shh-dependent Smo ciliary enrichment,  
277 ARL13B<sup>V358A</sup> regulates Smo localization normally, arguing this function of ARL13B can  
278 occur when the protein is not in cilia.

279 In addition to aberrations in Smo trafficking, loss of *Arl13b* leads to changes in  
280 the cilia localization of other Shh components in MEFs (Larkins et al. 2011). To  
281 determine whether these components are disrupted by ARL13B<sup>V358A</sup>, we examined Gli2,  
282 Gli3, Sufu and Ptch1 in MEFs. We observed no differences in distribution of Gli2 or

283 Ptch1 among any of the examined genotypes (**Figure 5C, F**). In contrast, as we  
284 previously reported, we observed more Gli3 at the ciliary tip of *Arl13b<sup>hnn/hnn</sup>* cells and  
285 increased Sufu in *Arl13b<sup>hnn/hnn</sup>* cilia compared to wild type controls (Larkins et al.  
286 2011)(**Figure 5D, E**). Thus, Shh components are normally localized in *Arl13b<sup>V358A/V358A</sup>*  
287 MEFs consistent with the normal Shh signal transduction observed in *Arl13b<sup>V358A/V358A</sup>*  
288 embryos (**Figure 4**).

289

### 290 ***ARL13B regulates ciliary enrichment of ARL3 and INPP5E from within cilia.***

291 We next examined the role of ARL13B<sup>V358A</sup> in the localization of other ciliary  
292 proteins. ARL13B is the GEF for ARL3, and we showed that ARL13B<sup>V358A</sup> GEF activity  
293 for ARL3 is retained (**Figure 1**). ARL13B is also essential for cilia localization of  
294 INPP5E, as the proteins are in a common complex (Humbert et al. 2012). To determine  
295 whether the ciliary localization of either ARL3 or INPP5E was affected by ARL13B<sup>V358A</sup>,  
296 we performed immunofluorescence on MEFs. Ciliary ARL3 staining appeared the same  
297 in *Arl13b<sup>+/+</sup>* and *Arl13b<sup>V358A/+</sup>* MEFs, however ARL3 was not detectable in  
298 *Arl13b<sup>V358A/V358A</sup>* or *Arl13b<sup>hnn/hnn</sup>* cilia (**Figure 5G**). INPP5E was normally detectable in  
299 *Arl13b<sup>+/+</sup>* and *Arl13b<sup>V358A/+</sup>* MEF cilia, but not in *Arl13b<sup>V358A/V358A</sup>* and *Arl13b<sup>hnn/hnn</sup>* MEF  
300 cilia (**Figure 5H**). These results indicate that ARL13B is required in cilia for the proper  
301 localization of ARL3 and INPP5E to the cilium.

302

### 303 ***Ciliary ARL13B is required for normal cell ciliation and ciliary length***

304 Loss of *Arl13b* leads to defects in the percentage of ciliated MEFs and in cilia  
305 length (Caspary et al. 2007; Larkins et al. 2011). To test whether ARL13B<sup>V358A</sup> impacted

306 cell ciliation, we examined immortalized MEFs and counted the number of ciliated cells  
307 24 hours after induction of ciliation by growth in low serum (0.5% FBS). We found 73%  
308 ( $\pm 11\%$ ) of *Arl13b*<sup>+/+</sup> and 75%, ( $\pm 9.1\%$ ) of *Arl13b*<sup>V358A/+</sup> MEFs are ciliated, consistent with  
309 published results. In contrast, we found 45% ( $\pm 8.7\%$ ) of *Arl13b*<sup>V358A/V358A</sup> cells and 53%  
310 ( $\pm 6.4\%$ ) of *Arl13b*<sup>hnn/hnn</sup> cells had cilia (**Figure 6A**). Thus, *Arl13b*<sup>V358A/V358A</sup> cells exhibit a  
311 similar deficit in percentage of ciliated MEFs as complete loss of ARL13B function.

312 *Arl13b*<sup>hnn/hnn</sup> cilia are about half as long as wild type in both embryos and MEFs  
313 (Caspary et al. 2007; Larkins et al. 2011). To determine whether cilia length was  
314 affected by ARL13B<sup>V358A</sup>, we stained MEFs with acetylated  $\alpha$ -tubulin and measured the  
315 length of the axoneme. We found the average cilia length in *Arl13b*<sup>+/+</sup> and *Arl13b*<sup>V358A/+</sup>  
316 MEFs was similar,  $2.7 \pm 0.8 \mu\text{m}$  and  $2.6 \pm 0.9 \mu\text{m}$ , respectively. However, we found  
317 *Arl13b*<sup>V358A/V358A</sup> MEF cilia were shorter,  $1.9 \pm 0.7 \mu\text{m}$ , similar to *Arl13b*<sup>hnn/hnn</sup> MEF cilia  
318 which were  $2.15 \pm 0.8 \mu\text{m}$  (**Figure 6B**). These results indicate that ARL13B<sup>V358A</sup>  
319 phenocopies complete loss of ARL13B for ciliation and cilia length, indicating these  
320 ARL13B functions require ARL13B in cilia. Furthermore, these data show that ARL13B  
321 function within cilia is distinct from ARL13B function outside of cilia in a subset of  
322 activities, and that the cilia defects and Shh defects in the complete absence of ARL13B  
323 can be uncoupled.

## **Discussion**

324 Here we show that ARL13B's role(s) in cell ciliation and cilia length, along with  
325 the ciliary enrichment of a subset of proteins, can be uncoupled from ARL13B's function  
326 in regulating Shh signal transduction (**Figure 7**). Furthermore, we show this functional



327 distinction correlates with ARL13B spatial localization to the cilium. By generating a  
328 mouse expressing a cilia-excluded variant of ARL13B from the endogenous locus, we  
329 showed ARL13B<sup>V358A</sup> protein is not detectable in cilia of embryonic neural tube or  
330 MEFs, even upon retrograde ciliary dynein traffic blockade. Furthermore, we detected  
331 30% less ARL13B protein overall in *Arl13b*<sup>V358A/V358A</sup> embryos compared to control  
332 embryos. While this reduction is statistically significant, it is unclear whether it is  
333 biologically significant given that *Arl13b*<sup>hnn/hnn</sup> null mutations are recessive and no  
334 *Arl13b*<sup>hnn/+</sup> heterozygous phenotype is reported (Caspary et al. 2007; Larkins et al.  
335 2011).

336 In contrast to the E13.5 lethality of *Arl13b*<sup>hnn/hnn</sup> embryos, we found  
337 *Arl13b*<sup>V358A/V358A</sup> mice were viable and fertile with correct patterning of the neural tube,  
338 indicating normal Shh signal transduction. These results are consistent with our data  
339 showing that ARL13B<sup>V358A</sup> protein retains all known biochemical function including GEF  
340 activity (Mariani et al. 2016; Ivanova et al. 2017). However, we observed several  
341 *Arl13b*<sup>hnn/hnn</sup> phenotypes in *Arl13b*<sup>V358A/V358A</sup> cells, including loss of ARL3 and INPP5E  
342 ciliary enrichment, along with low percentage of ciliated cells and shorter average cilia  
343 length. Taken together, our data show that despite the normal high ciliary enrichment of  
344 wild type ARL13B and the requirement of cilia for Shh signaling, cilia-excluded  
345 ARL13B<sup>V358A</sup> is sufficient for Shh signal transduction.

346 We regard ARL13B<sup>V358A</sup> as cilia-excluded based on several lines of evidence.  
347 We did not detect ciliary ARL13B<sup>V358A</sup> *in vivo* or *in vitro* using any of five validated  
348 ARL13B antibodies. These antibodies are against two antigens, the full-length protein or  
349 residues 208-427, and were independently generated so are likely to recognize a

350 number of epitopes. Given that 4 of 5 antibodies are polyclonal and ARL13B<sup>V358A</sup>  
351 displays normal GTP binding, intrinsic and GAP-stimulated GTP hydrolysis, and ARL3  
352 GEF activity, it is likely that the ARL13B<sup>V358A</sup> protein retains the wild type structure  
353 enabling antibody recognition. Indeed, we observed little or no loss in sensitivity in  
354 detecting protein in the immunoblot assays. Furthermore, we could not forcibly enrich  
355 ciliary ARL13B<sup>V358A</sup> through retrograde transport blockade with ciliobrevin-D nor could  
356 we detect any ciliary enrichment of ARL13B<sup>V358A</sup> upon overexposure of the relevant  
357 fluorescent channel. Alternative ways of trafficking proteins out of cilia include BBSome-  
358 dependent or diffusion-dependent mechanisms raising the possibility that ARL13B is not  
359 trafficked via dynein-independent mechanisms. The fact that we observed ciliary  
360 phenotypes, namely short cilia and abnormal ciliary ARL3 and INPP5E localization in  
361 ARL13B<sup>V358A</sup> cells, argue that ARL13B normally performs these functions from within  
362 cilia (Caspary et al. 2007; Larkins et al. 2011; Zhang et al. 2016; Humbert et al. 2012;  
363 Nozaki et al. 2017). While we cannot exclude the possibility that sub-detectable levels of  
364 ARL13B<sup>V358A</sup> are present and functional in cilia, we note such a level would need to be  
365 sufficient for Shh signaling yet insufficient for ARL3 or INPP5E ciliary localization along  
366 with proper regulation of cilia length.

367 Our data support ARL13B regulating different biological processes from its  
368 distinct subcellular localizations. ARL13B<sup>V358A</sup> disrupts cilia localization of INPP5E and  
369 ARL3, but not Shh components. It is surprising that ARL13B<sup>V358A</sup> is sufficient to regulate  
370 Shh signaling because cilia are required for Shh signal transduction and because  
371 ARL13B is highly enriched in cilia (Caspary et al. 2007; Huangfu et al. 2003). These  
372 observations suggested that the ciliary defects observed in *Arl13b*<sup>hnn/hnn</sup> mutants caused

373 the Shh defects. However, our data with ARL13B<sup>V358A</sup> indicate that ARL13B regulates  
374 cilia length and Shh signaling through distinct localization and effectors. Thus, the cilia  
375 defects in *Arl13b*<sup>hnn/hnn</sup> mutants do not underlie Shh misregulation.

376         Based on the normal cilia trafficking of Shh components in *Arl13b*<sup>V358A/V358A</sup>  
377 mutants and the abnormal cilia trafficking of Shh components in the complete absence  
378 of ARL13B (Larkins et al. 2011), ARL13B likely regulates Shh signaling from the cell  
379 body by controlling Shh component traffic to and/or from the primary cilium. Both Smo  
380 and ARL13B traffic is linked to endosomes providing one possible non-ciliary organelle  
381 (Barral et al. 2012; Wang et al. 2009; Milenkovic et al. 2009). *Arl13b*<sup>hnn/hnn</sup> cells display  
382 constitutive Smo ciliary enrichment along with little enrichment of Gli proteins at the  
383 ciliary tip (Larkins et al. 2011). Our data do not distinguish between ARL13B playing  
384 direct roles in traffic of multiple Shh components or whether the normal Smo ciliary  
385 enrichment with ARL13B<sup>V358A</sup> subsequently causes normal cilia traffic of downstream  
386 components. ARL13B regulates a step downstream of activated Smo that controls  
387 transcription factor Gli activation, but not repression (Caspary et al. 2007; Bay et al.  
388 2018). We argue from our results that this step is also intact in the presence of  
389 ARL13B<sup>V358A</sup>.

390         The fact that ARL13B<sup>V358A</sup> can mediate normal ciliary Smo enrichment is  
391 especially interesting given that ARL3 and INPP5E localization to cilia is compromised  
392 by this mutation. This suggests that ARL13B controls cilia enrichment via multiple  
393 localizations and effectors. This is consistent with our understanding of ARF family  
394 members, as they are known to perform multiple tasks from different sites within a cell  
395 (Sztul et al. 2019). We speculate that ARL3 residence in cilia may require that ARL3 be

396 in (or at least cycle through) its activated, GTP-bound conformation as ARL13B<sup>V358A</sup>  
397 retains its ARL3 GEF activity, but not its cilia localization. ARL13B is in a common  
398 protein complex with INPP5E so absence of ARL13B from cilia may disrupt formation or  
399 maintenance of the complex there (Humbert et al. 2012; Nozaki et al. 2017). INPP5E  
400 regulates Shh signaling through regulation of the phosphoinositol composition of the  
401 ciliary membrane. INPP5E loss results in increased ciliary PIP<sub>2</sub> and enrichment of Shh  
402 repressors in cilia thus resulting in lowered Shh response (Garcia-Gonzalo et al. 2015;  
403 Chavez et al. 2015; Dyson et al. 2017). It is not clear why the absence of ciliary INPP5E  
404 in ARL13B<sup>V358A</sup> cells does not lead to aberrant Shh signal transduction.

405 In *Arl13b*<sup>hnn/hnn</sup> embryos and MEFs, cilia are shorter than normal and have a  
406 microtubule defect where the B-tubule of the microtubule outer doublet is open  
407 (Caspary et al. 2007; Larkins et al. 2011). Consistent with this, we observed shorter cilia  
408 in *Arl13b*<sup>V358A/V358A</sup> MEFs. Similarly, we observed a comparable reduction in the percent  
409 of cilia in *Arl13b*<sup>hnn/hnn</sup> and *Arl13b*<sup>V358A/V358A</sup> MEFs compared to wild type MEFs. While  
410 loss of ARL13B results in short cilia, increased expression of ARL13B promotes cilia  
411 elongation so it is not yet clear what ARL13B's role is in controlling cilia length (Lu et al.  
412 2015; Hori et al. 2008; Caspary et al. 2007; Larkins et al. 2011). Additionally, it is  
413 unclear whether the mechanism from within cilia through which ARL13B controls length  
414 or percent of ciliated cells is the same, or distinct from, the mechanism through which  
415 ARL13B regulates ARL3 or INPP5E residence in cilia.

416 Perhaps the most intriguing implication of our data pertains to understanding the  
417 evolution of cilia and Hh signaling. ARL13 functions in cilia formation and maintenance  
418 in *Chlamydomonas* and *C. elegans*, neither of which have Hh signaling, consistent with

419 the ancient role of ARL13 controlling ciliation and cilia length (Cevik et al. 2010; Cevik et  
420 al. 2013; Stolc et al. 2005; Miertzschke et al. 2014). Our data support ARL13B retaining  
421 ARL13's ancient role in ciliogenesis. However, our data show that ARL13B does not  
422 work from within the cilium to regulate Shh component ciliary traffic or Shh signal  
423 transduction. As an ARL protein involved in membrane traffic, we speculate that  
424 ARL13B may have linked Shh component trafficking to the primary cilium, albeit from  
425 outside the cilium. That the ARL13 duplication could relate to the mechanism linking  
426 primary cilia and Hh signaling within the deuterostome lineage is a possibility worth  
427 exploring.  
428

| <b>Key Resources Table</b>                |                                |                            |                                    |                               |
|-------------------------------------------|--------------------------------|----------------------------|------------------------------------|-------------------------------|
| <b>Reagent type (species) or resource</b> | <b>Designation</b>             | <b>Source or reference</b> | <b>Identifiers</b>                 | <b>Additional information</b> |
| gene ( <i>M. Musculus</i> )               | <i>Arl13b</i>                  |                            | MGI Cat# 6115585, RRID:MGI:6115585 |                               |
| Genetic reagent ( <i>M. Musculus</i> )    | <i>hennin</i>                  | PMID:17488627              | MGI Cat# 3580673, RRID:MGI:3580673 | <i>Arl13b</i> null allele     |
| Genetic reagent ( <i>M. Musculus</i> )    | <i>em1Tc (V358A)</i>           | This paper                 | MGI: 6256969                       | New CRISPR Point mutant       |
| Genetic reagent ( <i>M. Musculus</i> )    | FBV/NJ                         | Jackson Laboratory         | Stock #001800 MGI:2163709          |                               |
| cell lines ( <i>M. Musculus</i> )         | Fibroblast (normal, embryonic) | This paper                 |                                    | Maintained in Caspary lab     |

|          |                                                 |                                      |                                                                 |        |
|----------|-------------------------------------------------|--------------------------------------|-----------------------------------------------------------------|--------|
| Antibody | Anti-Shh<br>(Mouse Monoclonal)                  | Developmental Studies Hybridoma Bank | DSHB Cat# 5E1,<br>RRID:AB_528466                                | 1:5    |
| Antibody | Anti-Nkx2.2<br>(Mouse Monoclonal)               | Developmental Studies Hybridoma Bank | DSHB Cat# 74.5A5,<br>RRID:AB_531794                             | 1:5    |
| Antibody | Anti-Hb9<br>(Mouse Monoclonal)                  | Developmental Studies Hybridoma Bank | DSHB Cat# 81.5C10,<br>RRID:AB_2145209                           | 1:5    |
| Antibody | Anti-Nkx6.1<br>(Mouse Monoclonal)               | Developmental Studies Hybridoma Bank | DSHB Cat# F55A10,<br>RRID:AB_532378                             | 1:50   |
| Antibody | Anti-acetylated a-tubulin<br>(Mouse Monoclonal) | Millipore Sigma                      | Sigma-Aldrich Cat# T6793,<br>RRID:AB_477585                     | 1:2500 |
| Antibody | Anti-Olig2<br>(Rabbit Polyclonal)               | Millipore Sigma                      | Millipore Cat# AB9610,<br>RRID:AB_570666                        | 1:300  |
| Antibody | Anti-Arl13b<br>(Mouse Monoclonal)               | NeuroMab                             | UC Davis/NIH NeuroMab Facility Cat# 73-287,<br>RRID:AB_11000053 | 1:1000 |
| Antibody | Anti-Arl13b<br>(Rabbit Polyclonal)              | Protein Tech                         | Proteintech Cat# 17711-1-AP,<br>RRID:AB_2060867                 | 1:1000 |
| Antibody | Anti-Arl13b<br>(Rabbit Polyclonal)              | PMID:17488627                        | 503                                                             | 1:1000 |
| Antibody | Anti-Arl13b<br>(Rabbit Polyclonal)              | PMID:17488627                        | 504                                                             | 1:1000 |
| Antibody | Anti-Arl13b<br>(Rabbit Polyclonal)              | PMID:17488627                        | 505                                                             | 1:1000 |

|          |                                                 |                     |                                                                      |        |
|----------|-------------------------------------------------|---------------------|----------------------------------------------------------------------|--------|
| Antibody | Anti-Smo<br>(Rabbit<br>Polyclonal)              | K. Anderson         |                                                                      | 1:1000 |
| Antibody | Anti-IFT88<br>(Rabbit<br>Polyclonal)            | B. Yoder            |                                                                      | 1:1000 |
| Antibody | Anti-Arl3<br>(Rabbit<br>Polyclonal)             | PMID:8034651        |                                                                      | 1:1000 |
| Antibody | Anti-Inpp5e<br>(Rabbit<br>Polyclonal)           | Protein Tech        | Proteintech Cat#<br>17797-1-AP,<br>RRID:AB_216712<br>0               | 1:150  |
| Antibody | Anti-Gli2<br>(Guinea Pig<br>Polyclonal)         | J.<br>Eggenschwiler |                                                                      | 1:200  |
| Antibody | Anti-Gli3<br>(Goat<br>Polyclonal)               | R&D                 | R and D Systems<br>Cat# AF3690,<br>RRID:AB_223249<br>9               | 1:200  |
| Antibody | Anti-Ptch1<br>(Rabbit<br>Polyclonal)            | R. Rohatgi          |                                                                      | 1:150  |
| Antibody | Anti-Sufu<br>(Goat<br>Polyclonal)               | Santa Cruz          | Santa Cruz<br>Biotechnology<br>Cat# sc-10933,<br>RRID:AB_671172      | 1:100  |
| Antibody | Alexa Fluor<br>goat anti-<br>mouse<br>IgG2a 488 | ThermoFisher        | Thermo Fisher<br>Scientific Cat# A-<br>21131,<br>RRID:AB_253577<br>1 | 1:300  |
| Antibody | Alexa Fluor<br>goat anti-<br>mouse IgG1<br>488  | ThermoFisher        | Thermo Fisher<br>Scientific Cat# A-<br>21121,<br>RRID:AB_253576<br>4 | 1:300  |
| Antibody | Alexa Fluor<br>goat anti-<br>mouse Ig 488       | ThermoFisher        | Molecular Probes<br>Cat# A-11029,<br>RRID:AB_138404                  | 1:300  |

|                        |                                        |                             |                                                         |                                                                                                                                                                             |
|------------------------|----------------------------------------|-----------------------------|---------------------------------------------------------|-----------------------------------------------------------------------------------------------------------------------------------------------------------------------------|
| Antibody               | Alexa Fluor goat anti-mouse IgG 568    | ThermoFisher                | Thermo Fisher Scientific Cat# A-11031, RRID:AB_144696   | 1:300                                                                                                                                                                       |
| Antibody               | Alexa Fluor donkey anti-rabbit IgG 488 | ThermoFisher                | Thermo Fisher Scientific Cat# A-21206, RRID:AB_253579 2 | 1:300                                                                                                                                                                       |
| Antibody               | Alexa Fluor donkey anti-rabbit IgG 555 | ThermoFisher                | Thermo Fisher Scientific Cat# A-31572, RRID:AB_162543   | 1:300                                                                                                                                                                       |
| Antibody               | Alexa Fluor goat anti-rabbit IgG 568   | ThermoFisher                | Thermo Fisher Scientific Cat# A-11011, RRID:AB_143157   | 1:300                                                                                                                                                                       |
| Antibody               | Alexa Fluor goat anti-mouse IgG2b 568  | ThermoFisher                | Thermo Fisher Scientific Cat# A-21147, RRID:AB_253578 3 | 1:300                                                                                                                                                                       |
| Antibody               | Hoechst nuclear stain                  | Millipore Sigma             | 94403                                                   | 1:3000                                                                                                                                                                      |
| sequence-based reagent | CRISPR gRNA                            | Millipore Sigma, this paper |                                                         | CCAGTCA<br>ATACAGA<br>CGAGTCT<br>A                                                                                                                                          |
| sequence-based reagent | CRISPR donor oligo                     | Millipore Sigma, this paper |                                                         | CCTATAT<br>TCTTCTA<br>GAAAACA<br>GTAAGAA<br>GAAAACC<br>AAGAAAC<br>TACGAAT<br>GAAAAGG<br>AGTCATC<br>GGGCAG<br>AACCAGT<br>GAATACA<br>GACGAGT<br>CTACTCC<br>AAAGAGT<br>CCCACGC |



|                                    |                                  |                                                                                 |                                                 |                                                 |
|------------------------------------|----------------------------------|---------------------------------------------------------------------------------|-------------------------------------------------|-------------------------------------------------|
|                                    |                                  |                                                                                 |                                                 | CTCCCCA<br>AC                                   |
| sequence-<br>based reagent         | F-231-Cac8I                      | This Paper                                                                      |                                                 | PCR<br>Primer AA<br>GAATGAA<br>AAGGAGT<br>CAGCG |
| sequence-<br>based reagent         | REV-1                            | This Paper                                                                      |                                                 | PCR<br>Primer<br>TGAACCG<br>CTAATGG<br>GAACT    |
| peptide,<br>recombinant<br>protein | Arl13b <sup>WT</sup> -<br>GST    | This Paper                                                                      |                                                 | Purified<br>from cells                          |
| peptide,<br>recombinant<br>protein | Arl13b <sup>V358A</sup> -<br>GST | This Paper                                                                      |                                                 | Purified<br>from cells                          |
| peptide,<br>recombinant<br>protein | Arl3<br>(human)                  | PMID:11303027                                                                   |                                                 | Purified<br>from cells                          |
| peptide,<br>recombinant<br>protein | Cas9                             | Millipore Sigma                                                                 | C120010                                         | 50 µg                                           |
| peptide,<br>recombinant<br>protein | Cac8I                            | New England<br>Biolabs                                                          | R0579L                                          | Restriction<br>enzyme                           |
| chemical<br>compound,<br>drug      | Ciliobrevin-D                    | Millipore Sigma                                                                 | 250401                                          | 30 µM                                           |
| chemical<br>compound,<br>drug      | [3H]GDP                          | PerkinElmer Life<br>Sciences                                                    | NET966                                          | 3,000<br>cpm/pmol                               |
| chemical<br>compound,<br>drug      | GTPγS35                          | PerkinElmer Life<br>Sciences                                                    | NEG030H                                         |                                                 |
| Software,<br>algorithm             | ImageJ<br>software               | ImageJ<br>( <a href="http://imagej.nih.gov/ij/">http://imagej.nih.gov/ij/</a> ) | <a href="#">ImageJ</a> ,<br>RRID:SCR_00307<br>0 |                                                 |

|                     |                         |                                       |                                                  |               |
|---------------------|-------------------------|---------------------------------------|--------------------------------------------------|---------------|
| Software, algorithm | GraphPad Prism software | GraphPad Prism (https://graphpad.com) | <a href="#">GraphPad Prism</a> , RRID:SCR_002798 | Version 8.0.0 |
|---------------------|-------------------------|---------------------------------------|--------------------------------------------------|---------------|

## **Methods**

### 429 *Protein purification and ARL3 GEF assay*

430 Plasmids directing the expression of mouse GST-ARL13B or GST-ARL13B<sup>V358A</sup>  
431 proteins were transiently transfected into HEK cells and the recombinant proteins were  
432 later purified by affinity chromatography using glutathione-Sepharose, as described  
433 previously (Cavenagh et al. 1994; Ivanova et al. 2017). Human ARL3 (98.4% identical  
434 to mouse ARL3) was expressed in BL21 bacteria and purified as previously described  
435 (Van Valkenburgh et al. 2001). The ARL3 GEF assay was performed as previously  
436 described (Ivanova et al. 2017). Briefly, ARL3 (10 $\mu$ M) was pre-incubated with [<sup>3</sup>H]GDP  
437 (1  $\mu$ M; PerkinElmer Life Sciences, specific activity ~3,000 cpm/pmol) for 1 h at 30°C in  
438 25 mM HEPES, pH 7.4, 100 mM NaCl, 10 mM MgCl<sub>2</sub>. In contrast, pre-loading of  
439 ARL13B (10 $\mu$ M) was achieved by incubation in 100  $\mu$ M GTP $\gamma$ S for 1 min at room  
440 temperature, due to its much more rapid exchange kinetics. The GEF assay was  
441 initiated upon addition of ARL3 (final = 1 $\mu$ M), ARL13B (final = 0 or 1 $\mu$ M), 10  $\mu$ M GTP $\gamma$ S,  
442 and 100  $\mu$ M GDP (to prevent re-binding of any released [<sup>3</sup>H]GDP), in a final volume of  
443 100  $\mu$ L. The intrinsic rate of GDP dissociation from ARL3 was determined in parallel as  
444 that released in the absence of any added ARL13B. The reactions were stopped at  
445 different times (0–15 min) by dilution of 10 $\mu$ L of the reaction mixture into 2 ml of ice-cold  
446 buffer (20 mM Tris, pH 7.5, 100 mM NaCl, 10 mM MgCl<sub>2</sub>, 1 mM dithiothreitol). The  
447 amount of ARL3-bound [<sup>3</sup>H]GDP was determined by rapid filtration through BA85

448 nitrocellulose filters (0.45  $\mu$ m, 25 mm, Whatman), with 3 x 2 mL washes, and quantified  
449 using liquid scintillation counting. Time points are routinely collected in at least duplicate  
450 and each experiment reported was repeated at least twice, yielding very similar results.  
451 Data were analyzed in GraphPad Prism 7 software.

452

### 453 *Mouse allele generation and identification*

454 All mice were cared for in accordance with NIH guidelines and Emory's  
455 Institutional Animal Care and Use Committee (IACUC). Lines used were *Arl13b*<sup>V358A</sup>  
456 (*Arl13b*<sup>em1Tc</sup>) [MGI: 6256969], *Arl13b*<sup>hmn</sup> [MGI: 3578151] and FVB/NJ (Jackson  
457 Laboratory). To generate the V358A point mutation in the mouse, a CRISPR gRNA  
458 (CCAGTCAATACAGACGAGTCTA) targeting exon 8 of the *Arl13b* locus along with a  
459 donor oligo (5'-  
460 CCTATATTCTTCTAGAAAACAGTAAGAAGAAAACCAAGAACTACGAATGAAAAGGA  
461 GTCATCGGGCCAGAACCAGTGAATACAGACGAGTCTACTCCAAAGAGTCCCACGCC  
462 TCCCCAAC-3'; underlined bases are engineered) were designed to generate a T-to-C  
463 change creating the V358A point mutation and C-to-G change creating a TspRI  
464 restriction site that could be used for genotyping (Millipore Sigma). The gRNA (50  
465 ng/ $\mu$ l), oligo donor (50 ng/ $\mu$ l) and CRISPR protein (100 ng/ $\mu$ L) were injected by the  
466 Emory Transgenic and Gene Targeting core into one-cell C57Bl/6J zygotes. Zygotes  
467 were cultured to 2-cell before being transferred to pseudopregnant females. Genomic  
468 tail DNA from resulting offspring was amplified using PCR primers (5'-  
469 GAAGCAGGCATGGTGGTAAT-3' & 5'-TGAACCGCTAATGGGAAATC-3') located  
470 upstream and downstream of the donor oligo breakpoints. The products were

471 sequenced (5'-GAAGCAGGCATGGTGGTAAT-3') and 2 animals were identified  
472 heterozygous for the desired change and with no additional editing. One line (#173) was  
473 bred to FVB/NJ for three generations prior to performing any phenotypic analysis. Males  
474 from at least two distinct meiotic recombination opportunities were used in each  
475 generation that to minimize potential confounds associated with off-target  
476 CRISPR/Cas9 editing.

477 Genotyping was performed on DNA extracted from ear punch or yolk sac via  
478 PCR using the following primers: Fwd: 5'- AAGAATGAAAAGGAGTCAGCG -3', Rev: 5'-  
479 TGAACCGCTAATGGGAAACT -3'; a SNP was engineered in the forward primer that, in  
480 combination with the V358A mutation, created a Cac8I restriction site. Thus, the PCR  
481 product was digested with Cac8I enzyme, run out on a 4% agarose gel and the relevant  
482 bands were detected: undigested wild type (~192bp) and digested mutant bands  
483 (~171bp).

484

#### 485 *Phenotypic analysis of embryos*

486 Timed matings of heterozygous intercrosses were performed to generate embryos of  
487 the indicated stage, with somite-matched pairs examined at each stage when  
488 appropriate. Embryos were dissected in cold phosphate-buffered saline and processed  
489 for immunofluorescence staining as previously described (Horner et al. 2011).

490

#### 491 *Mouse embryonic fibroblasts*

492 Mouse embryonic fibroblasts (MEFs) were isolated and immortalized as previously  
493 described (Mariani et al. 2016). The identity of all cell lines were confirmed by

494 genotyping PCR and tested mycoplasma negative. MEFs were maintained in DMEM  
495 with 10% fetal bovine serum (FBS) and 1% penicillin/streptomycin at 37°C in 5% CO<sub>2</sub>.  
496 For experimental use, *Arl13b*<sup>+/+</sup>, *Arl13b*<sup>V358A/+</sup>, and *Arl13b*<sup>V358A/V358A</sup> and *Arl13b*<sup>hnn/hnn</sup>  
497 MEFs were grown on coverslips at a density of 0.5 x 10<sup>6</sup> cells/mL and treated for 24 h  
498 with 0.5% FBS Shh conditioned media or 0.5% FBS media to induce ciliogenesis  
499 (Larkins et al. 2011).

500

### 501 *Antibodies*

502 Primary antibodies used were: mouse anti-Shh (5E1), mouse anti-Nkx2.2 (74.5A5),  
503 mouse anti-HB9 (81.5C10), mouse anti-Nkx6.1 (F55A10) (1:5 Developmental Studies  
504 Hybridoma Bank); rabbit anti-Olig2 (1:300 Millipore AB9610); mouse anti-acetylated  $\alpha$ -  
505 tubulin (1:2500 Millipore Sigma; T6793), mouse anti-ARL13B (1:1000 NeuroMab  
506 N295B/66), rabbit anti-ARL13B (1:1000, Protein Tech 17711-1-AP); rabbit anti-ARL13B  
507 sera from 3 distinct rabbits (503, 504 and 505) (Caspary Lab (Caspary et al. 2007)),  
508 rabbit anti-Smoothed (1:1000, kindly provided by K. Anderson); rabbit anti-IFT88  
509 (1:1000, kindly provided by B. Yoder); rabbit anti-ARL3 (1:1000, (Cavenagh et al.  
510 1994)); rabbit anti- INPP5E (1:150, Protein Tech 17797-1-AP); guinea pig anti-Gli2  
511 (1:200, kindly provided by J. Eggenschwiler); rabbit anti-Ptch1 (1:150, kindly provided  
512 by R. Rohatgi), goat anti-Sufu (1:100, SC10933, Santa Cruz); goat anti-Gli3 (1:200,  
513 R&D AF3690); Alexa Fluor 488 and Alexa Fluor 568 (1:300, ThermoFisher); and  
514 Hoechst nuclear stain (1:3000). In all depicted images the red channel is false colored  
515 as magenta for the benefit of readers.

516

## 517 *Image Quantification*

518 Fluorescent intensities were measured in ImageJ software. Cilia were first identified by  
519 positive acetylated  $\alpha$ -tubulin and an outline was hand drawn around the length of the  
520 cilium. The channel was switched to the protein of interest and a measurement of the  
521 average fluorescent intensity was acquired. The same outline was then used to acquire  
522 a background reading of the cell-body that most closely matched the background at the  
523 cilium. In all cases immunofluorescent averages of proteins of interest in cilia were  
524 normalized to cell-body intensities (Figure 3 – Figure supplement 1). For samples with  
525 antibodies targeting Gli2, Gli3, and Sufu the ciliary tip was isolated and measured. The  
526 cilia tip was identified by weak acetylated  $\alpha$ -tubulin staining or the cilium base was  
527 identified by the presence of the acetylated  $\alpha$ -tubulin positive fibrils in the cell body that  
528 cluster at the base of the cilium (Larkins et al. 2011). For samples with antibodies  
529 targeting Smo, Ptch1, ARL3, and INPP5E the entire cilium was measured. We plotted  
530 the ratio of fluorescence intensity of the protein of interest to the cell body background  
531 as violin plots. Within each plot the dashed lines represent the median and interquartile  
532 range. The number of cilia examined per genotype and per condition are listed below  
533 their respective plot. All data, except for Smo which varied both genotype and  
534 treatment, were analyzed by one-way ANOVA. In the event of a significant ANOVA,  
535 Tukey's multiple comparisons were employed to determine significance as all groups  
536 were compared. Smo fluorescent intensity data were analyzed by two-way ANOVA. As  
537 only specific groups were compared, the significance of those comparisons across and  
538 between groups were made using Sidak's post-hoc to not inflate the significance of  
539 those comparisons Data were analyzed in GraphPad Prism 7 software.

540 In a similar experiment, retrograde IFT was inhibited by the addition of 30  $\mu$ M  
541 ciliobrevin-D (Millipore Sigma; 250401) or 0.1% DMSO control in low-serum media for  
542 60 min after ciliation was induced by serum starvation for 24 h prior with 0.5% FBS  
543 media. Cilia were identified by staining with antibodies directed against acetylated  $\alpha$ -  
544 tubulin, IFT88, and ARL13B. Fluorescent intensities were measured in ImageJ software.  
545 Again, cilia were first identified by positive acetylated  $\alpha$ -tubulin and an outline was hand  
546 drawn. The channel was switched to the protein of interest and a measurement of the  
547 average fluorescent intensity was acquired. The same outline was then used to acquire  
548 a background reading of the cell-body. To measure IFT88, the cilia tip was identified by  
549 weak acetylated  $\alpha$ -tubulin staining or the cilium base was identified by the presence of  
550 acetylated  $\alpha$ -tubulin fibrils in the cell body that cluster at the base of the cilium (Larkins  
551 et al. 2011). To make comparisons among cell lines of distinct genotype with and  
552 without ciliobrevin-D treatment, data were analyzed by two-way ANOVA. To analyze the  
553 specific differences across groups, multiple comparisons were made using Sidak's post-  
554 hoc.

555

#### 556 *Western Blots*

557 Western blotting was performed as previously described (Mariani et al. 2016), with  
558 antibody against ARL13B (1:1000 Neuromab N295B/66). Lysates were prepared with  
559 RIPA buffer and SigmaFast protease inhibitors (Nachtergaele et al. 2013). Values  
560 presented as volume intensity measured by chemiluminescence detected on ChemiDoc  
561 Touch Imaging System were normalized to total protein as measured on a stain-free gel  
562 (Thacker et al. 2016; Rivero-Gutierrez et al. 2014). Normalized values were analyzed by

563 one-way ANOVA and Tukey's multiple comparisons. Data were analyzed in GraphPad  
564 Prism 7 software.

565

566 *Materials in this manuscript are available, those interested should contract the*  
567 *corresponding author.*

568

### 569 **Acknowledgements**

570 This work was supported by funding from NIH grants R01NS090029 and R35GM122549 to T.C.  
571 and R35GM122568 to R.A.K. E.D.G. was supported by NIH training grant T32NS096050 and a  
572 diversity supplement to R01NS090029. Further support came from the Emory Integrated Mouse  
573 Transgenic and Gene Targeting Core, which is subsidized by the Emory University School of  
574 Medicine and with support by the Georgia Clinical & Translational Science Alliance of the  
575 National Institutes of Health under Award Number UL1TR002378 as well as the Emory  
576 University Integrated Cellular Imaging Microscopy Core of the Emory Neuroscience NINDS  
577 Core Facilities grant, P30NS055077. We are grateful to Alyssa Long and Sarah Suci for  
578 sequencing potential CRISPR founders, and to members of the Caspary lab for discussion and  
579 manuscript comments.

### **Competing Interests**

580 The authors have no competing interests to disclose.



## References

- 581 Aza-Blanc, P., H. Y. Lin, A. Ruiz i Altaba, and T. B. Kornberg. 2000. 'Expression of the  
582 vertebrate Gli proteins in Drosophila reveals a distribution of activator and repressor  
583 activities', *Development*, 127: 4293-301.
- 584 Bangs, F. K., N. Schrode, A. K. Hadjantonakis, and K. V. Anderson. 2015. 'Lineage specificity  
585 of primary cilia in the mouse embryo', *Nat Cell Biol*, 17: 113-22.
- 586 Barral, D. C., S. Garg, C. Casalou, G. F. Watts, J. L. Sandoval, J. S. Ramalho, V. W. Hsu, and  
587 M. B. Brenner. 2012. 'Arl13b regulates endocytic recycling traffic', *Proc Natl Acad Sci U*  
588 *S A*, 109: 21354-9.
- 589 Bay, S. N., A. B. Long, and T. Caspary. 2018. 'Disruption of the ciliary GTPase Arl13b  
590 suppresses Sonic hedgehog overactivation and inhibits medulloblastoma formation', *Proc*  
591 *Natl Acad Sci U S A*, 115: 1570-75.
- 592 Briscoe, J., Y. Chen, T. M. Jessell, and G. Struhl. 2001. 'A hedgehog-insensitive form of patched  
593 provides evidence for direct long-range morphogen activity of sonic hedgehog in the  
594 neural tube', *Mol Cell*, 7: 1279-91.
- 595 Briscoe, J., and P. P. Therond. 2013. 'The mechanisms of Hedgehog signalling and its roles in  
596 development and disease', *Nat Rev Mol Cell Biol*, 14: 416-29.
- 597 Casalou, C., C. Seixas, A. Portelinha, P. Pintado, M. Barros, J. S. Ramalho, S. S. Lopes, and D.  
598 C. Barral. 2014. 'Arl13b and the non-muscle myosin heavy chain IIA are required for  
599 circular dorsal ruffle formation and cell migration', *J Cell Sci*, 127: 2709-22.
- 600 Caspary, T., C. E. Larkins, and K. V. Anderson. 2007. 'The graded response to Sonic Hedgehog  
601 depends on cilia architecture', *Dev Cell*, 12: 767-78.
- 602 Cavenagh, M. M., M. Breiner, A. Schurmann, A. G. Rosenwald, T. Terui, C. Zhang, P. A.  
603 Randazzo, M. Adams, H. G. Joost, and R. A. Kahn. 1994. 'ADP-ribosylation factor  
604 (ARF)-like 3, a new member of the ARF family of GTP-binding proteins cloned from  
605 human and rat tissues', *J Biol Chem*, 269: 18937-42.
- 606 Cevik, S., Y. Hori, O. I. Kaplan, K. Kida, T. Toivenon, C. Foley-Fisher, D. Cottell, T. Katada, K.  
607 Kontani, and O. E. Blacque. 2010. 'Joubert syndrome Arl13b functions at ciliary  
608 membranes and stabilizes protein transport in Caenorhabditis elegans', *J Cell Biol*, 188:  
609 953-69.
- 610 Cevik, S., A. A. Sanders, E. Van Wijk, K. Boldt, L. Clarke, J. van Reeuwijk, Y. Hori, N. Horn,  
611 L. Hetterschijt, A. Wdowicz, A. Mullins, K. Kida, O. I. Kaplan, S. E. van Beersum, K.  
612 Man Wu, S. J. Letteboer, D. A. Mans, T. Katada, K. Kontani, M. Ueffing, R. Roepman,  
613 H. Kremer, and O. E. Blacque. 2013. 'Active transport and diffusion barriers restrict  
614 Joubert Syndrome-associated ARL13B/ARL-13 to an Inv-like ciliary membrane  
615 subdomain', *PLoS Genet*, 9: e1003977.
- 616 Chavez, M., S. Ena, J. Van Sande, A. de Kerchove d'Exaerde, S. Schurmans, and S. N.  
617 Schiffmann. 2015. 'Modulation of Ciliary Phosphoinositide Content Regulates  
618 Trafficking and Sonic Hedgehog Signaling Output', *Dev Cell*, 34: 338-50.
- 619 Chiang, C., Y. Litington, E. Lee, K. E. Young, J. L. Corden, H. Westphal, and P. A. Beachy.  
620 1996. 'Cyclopia and defective axial patterning in mice lacking Sonic hedgehog gene  
621 function', *Nature*, 383: 407-13.
- 622 Consortium, C. elegans Sequencing. 1998. 'Genome sequence of the nematode C. elegans: a  
623 platform for investigating biology', *Science*, 282: 2012-8.
- 624 Corbit, K. C., P. Aanstad, V. Singla, A. R. Norman, D. Y. Stainier, and J. F. Reiter. 2005.  
625 'Vertebrate Smoothed functions at the primary cilium', *Nature*, 437: 1018-21.

- 626 Cortellino, S., C. Wang, B. Wang, M. R. Bassi, E. Caretti, D. Champeval, A. Calmont, M.  
627 Jarnik, J. Burch, K. S. Zaret, L. Larue, and A. Bellacosa. 2009. 'Defective ciliogenesis,  
628 embryonic lethality and severe impairment of the Sonic Hedgehog pathway caused by  
629 inactivation of the mouse complex A intraflagellar transport gene *Ift122/Wdr10*, partially  
630 overlapping with the DNA repair gene *Med1/Mbd4*', *Dev Biol*, 325: 225-37.
- 631 D'Souza-Schorey, C., and P. Chavrier. 2006. 'ARF proteins: roles in membrane traffic and  
632 beyond', *Nat Rev Mol Cell Biol*, 7: 347-58.
- 633 Dessaud, E., L. L. Yang, K. Hill, B. Cox, F. Ulloa, A. Ribeiro, A. Mynett, B. G. Novitch, and J.  
634 Briscoe. 2007. 'Interpretation of the sonic hedgehog morphogen gradient by a temporal  
635 adaptation mechanism', *Nature*, 450: 717-20.
- 636 Dyson, J. M., S. E. Conduit, S. J. Feeney, S. Hakim, T. DiTommaso, A. J. Fulcher, A. Sriratana,  
637 G. Ramm, K. A. Horan, R. Gurung, C. Wicking, I. Smyth, and C. A. Mitchell. 2017.  
638 'INPP5E regulates phosphoinositide-dependent cilia transition zone function', *J Cell Biol*,  
639 216: 247-63.
- 640 East, M. P., J. B. Bowzard, J. B. Dacks, and R. A. Kahn. 2012. 'ELMO domains, evolutionary  
641 and functional characterization of a novel GTPase-activating protein (GAP) domain for  
642 Arf protein family GTPases', *J Biol Chem*, 287: 39538-53.
- 643 Firestone, A. J., J. S. Weinger, M. Maldonado, K. Barlan, L. D. Langston, M. O'Donnell, V. I.  
644 Gelfand, T. M. Kapoor, and J. K. Chen. 2012. 'Small-molecule inhibitors of the AAA+  
645 ATPase motor cytoplasmic dynein', *Nature*, 484: 125-9.
- 646 Garcia-Gonzalo, F. R., S. C. Phua, E. C. Roberson, G. Garcia, 3rd, M. Abedin, S. Schurmans, T.  
647 Inoue, and J. F. Reiter. 2015. 'Phosphoinositides Regulate Ciliary Protein Trafficking to  
648 Modulate Hedgehog Signaling', *Dev Cell*, 34: 400-09.
- 649 Goetz, S. C., P. J. Ocbina, and K. V. Anderson. 2009. 'The primary cilium as a Hedgehog signal  
650 transduction machine', *Methods Cell Biol*, 94: 199-222.
- 651 Gotthardt, K., M. Lokaj, C. Koerner, N. Falk, A. Giessl, and A. Wittinghofer. 2015. 'A G-protein  
652 activation cascade from Arl13B to Arl3 and implications for ciliary targeting of lipidated  
653 proteins', *Elife*, 4.
- 654 Hanke-Gogokhia, C., Z. Wu, C. D. Gerstner, J. M. Frederick, H. Zhang, and W. Baehr. 2016.  
655 'Arf-like Protein 3 (ARL3) Regulates Protein Trafficking and Ciliogenesis in Mouse  
656 Photoreceptors', *J Biol Chem*, 291: 7142-55.
- 657 Haycraft, C. J., B. Banizs, Y. Aydin-Son, Q. Zhang, E. J. Michaud, and B. K. Yoder. 2005. 'Gli2  
658 and Gli3 localize to cilia and require the intraflagellar transport protein polaris for  
659 processing and function', *PLoS Genet*, 1: e53.
- 660 Higginbotham, H., T. Y. Eom, L. E. Mariani, A. Bachleda, J. Hirt, V. Gukassyan, C. L. Cusack,  
661 C. Lai, T. Caspary, and E. S. Anton. 2012. 'Arl13b in primary cilia regulates the  
662 migration and placement of interneurons in the developing cerebral cortex', *Dev Cell*, 23:  
663 925-38.
- 664 Hori, Y., T. Kobayashi, Y. Kikko, K. Kontani, and T. Katada. 2008. 'Domain architecture of the  
665 atypical Arf-family GTPase Arl13b involved in cilia formation', *Biochem Biophys Res  
666 Commun*, 373: 119-24.
- 667 Horner, V. L., and T. Caspary. 2011. 'Disrupted dorsal neural tube BMP signaling in the cilia  
668 mutant Arl13b hnn stems from abnormal Shh signaling', *Dev Biol*, 355: 43-54.
- 669 Houde, C., R. J. Dickinson, V. M. Houtzager, R. Cullum, R. Montpetit, M. Metzler, E. M.  
670 Simpson, S. Roy, M. R. Hayden, P. A. Hoodless, and D. W. Nicholson. 2006. 'Hippi is  
671 essential for node cilia assembly and Sonic hedgehog signaling', *Dev Biol*, 300: 523-33.

- 672 Huangfu, D., and K. V. Anderson. 2005. 'Cilia and Hedgehog responsiveness in the mouse', *Proc*  
673 *Natl Acad Sci U S A*, 102: 11325-30.
- 674 Huangfu, D., A. Liu, A. S. Rakeman, N. S. Murcia, L. Niswander, and K. V. Anderson. 2003.  
675 'Hedgehog signalling in the mouse requires intraflagellar transport proteins', *Nature*, 426:  
676 83-7.
- 677 Huangfu, Danwei, and Kathryn V Anderson. 2006. 'Signaling from Smo to Ci/Gli: conservation  
678 and divergence of Hedgehog pathways from Drosophila to vertebrates', *Development*,  
679 133: 3-14.
- 680 Humbert, M. C., K. Weihbrecht, C. C. Searby, Y. Li, R. M. Pope, V. C. Sheffield, and S. Seo.  
681 2012. 'ARL13B, PDE6D, and CEP164 form a functional network for INPP5E ciliary  
682 targeting', *Proc Natl Acad Sci U S A*, 109: 19691-6.
- 683 Humke, E. W., K. V. Dorn, L. Milenkovic, M. P. Scott, and R. Rohatgi. 2010. 'The output of  
684 Hedgehog signaling is controlled by the dynamic association between Suppressor of  
685 Fused and the Gli proteins', *Genes Dev*, 24: 670-82.
- 686 Ingham, P. W., Y. Nakano, and C. Seger. 2011. 'Mechanisms and functions of Hedgehog  
687 signalling across the metazoa', *Nat Rev Genet*, 12: 393-406.
- 688 Ivanova, A. A., T. Caspary, N. T. Seyfried, D. M. Duong, A. B. West, Z. Liu, and R. A. Kahn.  
689 2017. 'Biochemical characterization of purified mammalian ARL13B protein indicates  
690 that it is an atypical GTPase and ARL3 guanine nucleotide exchange factor (GEF)', *J Biol*  
691 *Chem*, 292: 11091-108.
- 692 Kahn, R. A., E. Bruford, H. Inoue, J. M. Logsdon, Jr., Z. Nie, R. T. Premont, P. A. Randazzo, M.  
693 Satake, A. B. Theibert, M. L. Zapp, and D. Cassel. 2008. 'Consensus nomenclature for  
694 the human ArfGAP domain-containing proteins', *J Cell Biol*, 182: 1039-44.
- 695 Kim, J., M. Kato, and P. A. Beachy. 2009. 'Gli2 trafficking links Hedgehog-dependent activation  
696 of Smoothed in the primary cilium to transcriptional activation in the nucleus', *Proc*  
697 *Natl Acad Sci U S A*, 106: 21666-71.
- 698 Kong, J. H., C. Siebold, and R. Rohatgi. 2019. 'Biochemical mechanisms of vertebrate hedgehog  
699 signaling', *Development*, 146.
- 700 Kuwabara, P. E., M. H. Lee, T. Schedl, and G. S. Jefferis. 2000. 'A C. elegans patched gene, ptc-  
701 1, functions in germ-line cytokinesis', *Genes Dev*, 14: 1933-44.
- 702 Larkins, C. E., G. D. Aviles, M. P. East, R. A. Kahn, and T. Caspary. 2011. 'Arl13b regulates  
703 ciliogenesis and the dynamic localization of Shh signaling proteins', *Mol Biol Cell*, 22:  
704 4694-703.
- 705 Li, Y., W. G. Kelly, J. M. Logsdon, Jr., A. M. Schurko, B. D. Harfe, K. L. Hill-Harfe, and R. A.  
706 Kahn. 2004. 'Functional genomic analysis of the ADP-ribosylation factor family of  
707 GTPases: phylogeny among diverse eukaryotes and function in C. elegans', *FASEB J*, 18:  
708 1834-50.
- 709 Li, Y., Q. Wei, Y. Zhang, K. Ling, and J. Hu. 2010. 'The small GTPases ARL-13 and ARL-3  
710 coordinate intraflagellar transport and ciliogenesis', *J Cell Biol*, 189: 1039-51.
- 711 Liem, K. F., Jr., A. Ashe, M. He, P. Satir, J. Moran, D. Beier, C. Wicking, and K. V. Anderson.  
712 2012. 'The IFT-A complex regulates Shh signaling through cilia structure and membrane  
713 protein trafficking', *J Cell Biol*, 197: 789-800.
- 714 Liem, K. F., Jr., M. He, P. J. Ocbina, and K. V. Anderson. 2009. 'Mouse Kif7/Costal2 is a cilia-  
715 associated protein that regulates Sonic hedgehog signaling', *Proc Natl Acad Sci U S A*,  
716 106: 13377-82.

- 717 Lim, Y. S., C. E. Chua, and B. L. Tang. 2011. 'Rabs and other small GTPases in ciliary  
718 transport', *Biol Cell*, 103: 209-21.
- 719 Liu, A., B. Wang, and L. A. Niswander. 2005. 'Mouse intraflagellar transport proteins regulate  
720 both the activator and repressor functions of Gli transcription factors', *Development*, 132:  
721 3103-11.
- 722 Logsdon, J. M., Jr., and R. A. Kahn (ed.)^(eds.). 2004. *Arf Family GTPases*. In: Kahn RA, editor.  
723 Lu, H., M. T. Toh, V. Narasimhan, S. K. Thamilselvam, S. P. Choksi, and S. Roy. 2015. 'A  
724 function for the Joubert syndrome protein Arl13b in ciliary membrane extension and  
725 ciliary length regulation', *Dev Biol*, 397: 225-36.
- 726 Mariani, L. E., M. F. Bijlsma, A. I. Ivanova, S. K. Suci, R. A. Kahn, and T. Caspary. 2016.  
727 'Arl13b regulates Shh signaling from both inside and outside the cilium', *Mol Biol Cell*.
- 728 Miertzschke, M., C. Koerner, M. Spoerner, and A. Wittinghofer. 2014. 'Structural insights into  
729 the small G-protein Arl13B and implications for Joubert syndrome', *Biochem J*, 457: 301-  
730 11.
- 731 Milenkovic, L., M. P. Scott, and R. Rohatgi. 2009. 'Lateral transport of Smoothened from the  
732 plasma membrane to the membrane of the cilium', *J Cell Biol*, 187: 365-74.
- 733 Murdoch, J. N., and A. J. Copp. 2010. 'The relationship between sonic Hedgehog signaling, cilia,  
734 and neural tube defects', *Birth Defects Res A Clin Mol Teratol*, 88: 633-52.
- 735 Murray, S. A., J. L. Morgan, C. Kane, Y. Sharma, C. S. Heffner, J. Lake, and L. R. Donahue.  
736 2010. 'Mouse gestation length is genetically determined', *PLoS One*, 5: e12418.
- 737 Nachtergaele, S., D. M. Whalen, L. K. Mydock, Z. Zhao, T. Malinauskas, K. Krishnan, P. W.  
738 Ingham, D. F. Covey, C. Siebold, and R. Rohatgi. 2013. 'Structure and function of the  
739 Smoothened extracellular domain in vertebrate Hedgehog signaling', *Elife*, 2: e01340.
- 740 Nozaki, S., Y. Katoh, M. Terada, S. Michisaka, T. Funabashi, S. Takahashi, K. Kontani, and K.  
741 Nakayama. 2017. 'Regulation of ciliary retrograde protein trafficking by the Joubert  
742 syndrome proteins ARL13B and INPP5E', *J Cell Sci*, 130: 563-76.
- 743 Nusslein-Volhard, C., and E. Wieschaus. 1980. 'Mutations affecting segment number and  
744 polarity in *Drosophila*', *Nature*, 287: 795-801.
- 745 Placzek, M., and J. Briscoe. 2018. 'Sonic hedgehog in vertebrate neural tube development', *Int J*  
746 *Dev Biol*, 62: 225-34.
- 747 Raleigh, D. R., and J. F. Reiter. 2019. 'Misactivation of Hedgehog signaling causes inherited and  
748 sporadic cancers', *J Clin Invest*, 129: 465-75.
- 749 Revenkova, E., Q. Liu, G. L. Gusella, and C. Iomini. 2018. 'The Joubert syndrome protein  
750 ARL13B binds tubulin to maintain uniform distribution of proteins along the ciliary  
751 membrane', *J Cell Sci*, 131.
- 752 Rink, J. C., K. A. Gurley, S. A. Elliott, and A. Sanchez Alvarado. 2009. 'Planarian Hh signaling  
753 regulates regeneration polarity and links Hh pathway evolution to cilia', *Science*, 326:  
754 1406-10.
- 755 Rivero-Gutierrez, B., A. Anzola, O. Martinez-Augustin, and F. S. de Medina. 2014. 'Stain-free  
756 detection as loading control alternative to Ponceau and housekeeping protein  
757 immunodetection in Western blotting', *Anal Biochem*, 467: 1-3.
- 758 Roelink, H., A. Augsburger, J. Heemskerk, V. Korzh, S. Norlin, A. Ruiz i Altaba, Y. Tanabe, M.  
759 Placzek, T. Edlund, T. M. Jessell, and et al. 1994. 'Floor plate and motor neuron  
760 induction by vhh-1, a vertebrate homolog of hedgehog expressed by the notochord', *Cell*,  
761 76: 761-75.

- 762 Rohatgi, R., L. Milenkovic, and M. P. Scott. 2007. 'Patched1 regulates hedgehog signaling at the  
763 primary cilium', *Science*, 317: 372-6.
- 764 Roy, S. 2012. 'Cilia and Hedgehog: when and how was their marriage solemnized?',  
765 *Differentiation*, 83: S43-8.
- 766 Ruiz i Altaba, A. 1998. 'Combinatorial Gli gene function in floor plate and neuronal inductions  
767 by Sonic hedgehog', *Development*, 125: 2203-12.
- 768 Schlacht, A., K. Mowbrey, M. Elias, R. A. Kahn, and J. B. Dacks. 2013. 'Ancient complexity,  
769 opisthokont plasticity, and discovery of the 11th subfamily of Arf GAP proteins', *Traffic*,  
770 14: 636-49.
- 771 Seixas, C., S. Y. Choi, N. Polgar, N. L. Umberger, M. P. East, X. Zuo, H. Moreiras, R.  
772 Ghossoub, A. Benmerah, R. A. Kahn, B. Fogelgren, T. Caspary, J. H. Lipschutz, and D.  
773 C. Barral. 2016. 'Arl13b and the exocyst interact synergistically in ciliogenesis', *Mol Biol*  
774 *Cell*, 27: 308-20.
- 775 Sigg, Monika Abedin, Tabea Menchen, Chanjae Lee, Jeffery Johnson, Melissa K Jungnickel,  
776 Semil P Choksi, Galo Garcia 3rd, Henriette Busengdal, Gerard W Dougherty, and Petra  
777 Pennekamp. 2017. 'Evolutionary proteomics uncovers ancient associations of cilia with  
778 signaling pathways', *Developmental cell*, 43: 744-62. e11.
- 779 Stolc, V., M. P. Samanta, W. Tongprasit, and W. F. Marshall. 2005. 'Genome-wide  
780 transcriptional analysis of flagellar regeneration in *Chlamydomonas reinhardtii* identifies  
781 orthologs of ciliary disease genes', *Proc Natl Acad Sci U S A*, 102: 3703-7.
- 782 Sztul, E., P. W. Chen, J. E. Casanova, J. Cherfils, J. B. Dacks, D. G. Lambright, F. S. Lee, P. A.  
783 Randazzo, L. C. Santy, A. Schurmann, I. Wilhelmi, M. E. Yohe, and R. A. Kahn. 2019.  
784 'ARF GTPases and their GEFs and GAPs: concepts and challenges', *Mol Biol Cell*, 30:  
785 1249-71.
- 786 Taylor, S. P., T. J. Dantas, I. Duran, S. Wu, R. S. Lachman, Consortium University of  
787 Washington Center for Mendelian Genomics, S. F. Nelson, D. H. Cohn, R. B. Vallee, and  
788 D. Krakow. 2015. 'Mutations in *DYNC2LI1* disrupt cilia function and cause short rib  
789 polydactyly syndrome', *Nat Commun*, 6: 7092.
- 790 Thacker, J. S., D. H. Yeung, W. R. Staines, and J. G. Mielke. 2016. 'Total protein or high-  
791 abundance protein: Which offers the best loading control for Western blotting?', *Anal*  
792 *Biochem*, 496: 76-8.
- 793 Tran, P. V., C. J. Haycraft, T. Y. Besschetnova, A. Turbe-Doan, R. W. Stottmann, B. J. Herron,  
794 A. L. Chesebro, H. Qiu, P. J. Scherz, J. V. Shah, B. K. Yoder, and D. R. Beier. 2008.  
795 'THM1 negatively modulates mouse sonic hedgehog signal transduction and affects  
796 retrograde intraflagellar transport in cilia', *Nat Genet*, 40: 403-10.
- 797 Tuz, K., R. Bachmann-Gagescu, D. R. O'Day, K. Hua, C. R. Isabella, I. G. Phelps, A. E.  
798 Stolarski, B. J. O'Roak, J. C. Dempsey, C. Lourenco, A. Alswaid, C. G. Bonnemann, L.  
799 Medne, S. Nampoothiri, Z. Stark, R. J. Leventer, M. Topcu, A. Cansu, S. Jagadeesh, S.  
800 Done, G. E. Ishak, I. A. Glass, J. Shendure, S. C. Neuhaus, C. R. Haldeman-Englert, D.  
801 Doherty, and R. J. Ferland. 2014. 'Mutations in *CSPP1* cause primary cilia abnormalities  
802 and Joubert syndrome with or without Jeune asphyxiating thoracic dystrophy', *Am J Hum*  
803 *Genet*, 94: 62-72.
- 804 Van Valkenburgh, H., J. F. Shern, J. D. Sharer, X. Zhu, and R. A. Kahn. 2001. 'ADP-ribosylation  
805 factors (ARFs) and ARF-like 1 (ARL1) have both specific and shared effectors:  
806 characterizing ARL1-binding proteins', *J Biol Chem*, 276: 22826-37.

- 807 Wang, Y., Z. Zhou, C. T. Walsh, and A. P. McMahon. 2009. 'Selective translocation of  
808 intracellular Smoothed to the primary cilium in response to Hedgehog pathway  
809 modulation', *Proc Natl Acad Sci U S A*, 106: 2623-8.
- 810 Warner, J. F., A. M. McCarthy, R. L. Morris, and D. R. McClay. 2014. 'Hedgehog signaling  
811 requires motile cilia in the sea urchin', *Mol Biol Evol*, 31: 18-22.
- 812 Wen, X., C. K. Lai, M. Evangelista, J. A. Hongo, F. J. de Sauvage, and S. J. Scales. 2010.  
813 'Kinetics of hedgehog-dependent full-length Gli3 accumulation in primary cilia and  
814 subsequent degradation', *Mol Cell Biol*, 30: 1910-22.
- 815 Zhang, Q., Y. Li, Y. Zhang, V. E. Torres, P. C. Harris, K. Ling, and J. Hu. 2016. 'GTP-binding  
816 of ARL-3 is activated by ARL-13 as a GEF and stabilized by UNC-119', *Sci Rep*, 6:  
817 24534.
- 818 Zugasti, O., J. Rajan, and P. E. Kuwabara. 2005. 'The function and expansion of the Patched- and  
819 Hedgehog-related homologs in *C. elegans*', *Genome Res*, 15: 1402-10.  
820

## Figure Legends

### Figure 1.

821 **ARL3 GEF activity is retained in the ARL13B<sup>V358A</sup> mutant.** Time course of the  
822 release of pre-bound [<sup>3</sup>H]GDP from purified, recombinant ARL3 in the absence (ARL3)  
823 or presence of mouse wild type ARL13B or ARL13B<sup>V358A</sup> (mARL13B) are shown. See  
824 Methods for details. Error bars ± standard deviation.

### Figure 2.

825 **Generation of the *Arl13b*<sup>V358A/V358A</sup> mouse.**  
826 (A) Schematic of *Arl13b* gene and donor oligo (orange bar) at exon 8 used to generate  
827 the V358A causing point mutation. Arrows indicate primers used for allele validation. (B)  
828 *Arl13b* DNA and relevant amino acid sequence with the RVEP sequence in the orange  
829 box and the T-to-C mutation highlighted in pink. (C) Confocal images of cilia marker  
830 IFT88 (green) and ARL13B (magenta; NeuroMab) staining in neural tube of E10.5  
831 somite-matched embryos. ARL13B-positive cilia are visible in *Arl13b*<sup>+/+</sup> and  
832 *Arl13b*<sup>V358A/+</sup>, but not in *Arl13b*<sup>V358A/V358A</sup> embryos. (See Figure 2 – Figure supplement 1  
833 for images of neural tube cilia under saturating conditions.) At least 5 embryos per  
834 genotype across five litters were examined. Scale bars are 50 μm. (D) ARL13B Western  
835 blot of E10.5 whole embryo lysates, wild type (+/+), *Arl13b*<sup>V358A/+</sup> (A/+) and  
836 *Arl13b*<sup>V358A/V358A</sup> (A/A) and (E) quantification presented as average intensity normalized  
837 to total protein ± standard deviation. Representative blot of whole embryo lysates (n = 3  
838 embryos per genotype with technical duplicate of each). \* p < 0.05, one-way ANOVA  
839 and Tukey's multiple comparison.

### Figure 3.

840 **ARL13B<sup>V358A</sup> is undetectable in cilia and cannot be enriched by inhibition of**  
841 **retrograde transport.**

842 (A) Antibodies against ciliary markers acetylated  $\alpha$ -tubulin or IFT88 (magenta) and  
843 ARL13B (cyan) in *Arl13b<sup>V358A/V358A</sup>* MEFs. Representative images show staining for five  
844 indicated ARL13B antibodies: (PT) polyclonal rabbit antibody against full-length human  
845 ARL13B from ProteinTech, (503, 504, 505) polyclonal rabbit sera from three distinct  
846 rabbits raised against C-terminus of mouse ARL13B (amino acids 208-427) (Casparly et  
847 al. 2007), and (NM) monoclonal mouse antibody against C terminus of mouse ARL13B  
848 from NeuroMab. *Arl13b<sup>+/+</sup>* and *Arl13b<sup>V358A/+</sup>* show ciliary ARL13B staining. Table lists  
849 ARL13B-positive cilia and the total number of cilia identified by acetylated  $\alpha$ -tubulin or  
850 IFT88 antibody in parentheses. Cilia appear shorter in *Arl13b<sup>V358A/V358A</sup>* cells (see Fig.  
851 6). (B) IFT88 and (C) Gli3 (green) is enriched in the tips of cilia in *Arl13b<sup>+/+</sup>* (+/+),  
852 *Arl13b<sup>V358A/+</sup>* (A/+) and *Arl13b<sup>V358A/V358A</sup>* (A/A) cells following ciliobrevin-D treatment.  
853 Violin plots depict relative fluorescence of IFT88 and Gli3 at cilia tip to cell body with  
854 number of cilia measured (n) listed beneath each plot. (D & E) Table lists ARL13B  
855 (cyan) positive cilia (rabbit anti-ARL13B; ProteinTech or mouse anti-ARL13B;  
856 NeuroMab) and the total number of cilia (acetylated  $\alpha$ -tubulin: magenta) examined in  
857 control (DMSO) and ciliobrevin-D treated (30 $\mu$ M CB) cell lines. Representative images  
858 show staining for cilia and ARL13B. Staining of IFT88 and Gli3 analyzed by two-way  
859 ANOVA and Sidak's multiple comparisons. (\*\*\*)  $p < 0.001$ , \*\*\*\*  $p < 0.0001$ ).



#### Figure 4.

860 **ARL13B<sup>V358A</sup> mediates normal Shh signaling and neural tube patterning.**

861 (A-I) Whole embryo and neural tube sections of somite-matched littermates at E9.5,  
862 E10.5, and E12.5 stained with indicated markers of cell fate. Whole embryo scale bars:  
863 2 mm. (A'-I' & A''-F'') Shh-dependent neural tube patterning at three separate time  
864 points. Cell fate markers are listed above each image. All neural tube scale bars are 50  
865  $\mu\text{m}$ . Neural tube patterning was examined in five embryos for each embryonic stage. E,  
866 embryonic day.

#### Figure 5.

867 **ARL13B<sup>V358A</sup> mediates normal ciliary enrichment of Shh components, but not**  
868 **ARL3 or INPP5E.**

869 (A) Smo (green) enrichment in ventral neural tube cilia (acetylated  $\alpha$ -tubulin: magenta)  
870 is normal in E10.5 embryos. Images are confocal projections. Scale bar is 25  $\mu\text{m}$ . (B-H,  
871 Top) Quantification of average fluorescence intensity in the tip of the cilium (Gli2, Gli3,  
872 and Sufu) or the entire cilium (Ptch1, Smo, ARL3, and INPP5E) relative to background  
873 level. Violin plots depict relative fluorescent intensity per cilium with number of cilia  
874 examined below each plot. (B-H, Bottom) Representative images for each condition and  
875 cell type with the cilia marker acetylated  $\alpha$ -tubulin (magenta) and indicated protein  
876 (green). Wild type (+/+), heterozygous (A/+), homozygous (A/A) and *hennin* (*hnn*). Data  
877 analyzed by one-way ANOVA and Tukey's multiple comparisons, except Smo data  
878 analyzed by two-way ANOVA and 16 comparisons, corrected  $p < 0.003$  deemed  
879 significant. (\*\*  $p < 0.01$ , \*\*\*  $p < 0.001$ , \*\*\*\*  $p < 0.0001$ ).

## Figure 6.

### 880 **ARL13B<sup>V358A</sup> results in decreased ciliation rates and short cilia.**

881 (A) Quantification of ciliation rates in all cell types; wild type (+/+), heterozygous (A/+),  
882 homozygous (A/A) and *hennin* (*hnn*). Fewer *Arl13b<sup>V358A/V358A</sup>* and *Arl13b<sup>hnn/hnn</sup>* MEFs  
883 form cilia compared to *Arl13b<sup>+/+</sup>* or *Arl13b<sup>V358A/+</sup>* cells. (B) Quantification of axoneme  
884 length as labeled by acetylated  $\alpha$ -tubulin (magenta) in indicated MEFs. Data are  
885 presented as mean ( $\mu\text{m}$ )  $\pm$  standard deviation with the number of cilia measured per  
886 genotype depicted at the base of each bar. Data analyzed by one-way ANOVA and  
887 Tukey's multiple comparisons. (\*  $p < 0.05$ , \*\*  $p < 0.01$ , \*\*\*  $p < 0.001$ , \*\*\*\*  $p < 0.0001$ )

## Figure 7.

### 888 **Model comparing complete loss of ARL13B function to ciliary loss of ARL13B** 889 **function**

890 Wildtype (left), *Arl13b<sup>hnn/hnn</sup>* (middle), and *Arl13b<sup>V358A/V358A</sup>* (right) cilia represented as two  
891 halves. On the left half is the organization of Shh components in the presence of Shh  
892 ligand and on the right half is the organization of ARL13B interactors ARL3 and  
893 INPP5E. (A) ARL13B associates with the ciliary membrane. In the presence of Shh,  
894 Ptch1 is removed from cilia and Smo is visibly enriched in cilia. Smo is activated which  
895 promotes the processing of full-length Gli transcription factors into their activator forms  
896 (GliA), that are shuttled out of the cilium to promote Shh-dependent gene transcription.  
897 In addition, cilia proteins ARL3 and INPP5E are localized to the primary cilium. (B) In  
898 *Arl13b<sup>hnn/hnn</sup>* cells which are null for ARL13B, cilia are shorter than normal. Ciliary Ptch1  
899 and Smo are visible, although Smo appears punctate instead of diffuse. In addition, loss

900 of ARL13B decreases transcription of Shh-dependent genes due to lowered GliA.  
 901 *Arl13b<sup>hnn/hnn</sup>* cilia also display a failure of INPP5E and ARL3 to localize to the cilium.  
 902 Because ARL13B is the GEF for ARL3, we speculate in this schematic that ARL3  
 903 remains GDP bound in *Arl13b<sup>hnn/hnn</sup>* cells. (C) In *Arl13b<sup>V358A/V358A</sup>* cells, ARL13B<sup>V358A</sup> is  
 904 not detectable in cilia and appears diffuse within the cell body. *Arl13b<sup>V358A/V358A</sup>* cilia, like  
 905 *Arl13b<sup>hnn/hnn</sup>* cilia, are shorter than wildtype. We observe normal Shh-dependent ciliary  
 906 Smo enrichment and normal Shh transcriptional output. However, ARL3 and INPP5E  
 907 are absent from cilia, indicating that ciliary ARL13B is required for ciliary residence of  
 908 these proteins.

| <b>MICE</b>        | <b>Sex</b> | <b>wildtype</b> | <b>V358A/+</b> | <b>V358A/V358A</b> |                 |
|--------------------|------------|-----------------|----------------|--------------------|-----------------|
| <b>Het x Het</b>   | M (46.5%)  | 3               | 11             | 6                  |                 |
| <b>Avg. Litter</b> | F (53.5%)  | 6               | 8              | 9                  |                 |
| <b>7.3</b>         | % of Total | 20.9            | 44.2           | 34.9               | $\chi^2 = 0.60$ |
| <b>Het x Hom</b>   | M (60%)    | -               | 10             | 11                 |                 |
| <b>Avg. Litter</b> | F (40%)    | -               | 6              | 8                  |                 |
| <b>7.5</b>         | % of Total | -               | 45.7           | 54.3               | $\chi^2 = 0.69$ |
| <b>Hom x Hom</b>   | M (47.4%)  | -               | -              | 9                  |                 |
| <b>Avg. Litter</b> | F (52.6%)  | -               | -              | 10                 |                 |
| <b>9.5</b>         |            |                 |                |                    |                 |

**Table 1.**

909 Genotype of mice born to heterozygous and/or homozygous carrier parents. Data  
 910 analyzed by chi-squared test.

## Figure 2 – Supplement 1

911 **Overexposure of *Arl13b*<sup>V358A/V358A</sup> cilia in E10.5 neural tube reveals no clear**  
912 **ARL13B<sup>V358A</sup> presence in cilia.**  
913 Overexposure of cilia in E10.5 *Arl13b*<sup>+/+</sup>, *Arl13b*<sup>V358A/V358A</sup>, and *Arl13b*<sup>hnn/hnn</sup> embryonic  
914 neural tube, stained for IFT88 and ARL13B (NeuroMab). The ARL13B channel was  
915 overexposed for four seconds instead of one second.

## Figure 2 – Supplement 2

916 **Overexposure of *Arl13b*<sup>V358A/V358A</sup> cilia in MEFs reveals no clear ARL13B<sup>V358A</sup>**  
917 **presence in cilia.**  
918 (A) We identified acetylated  $\alpha$ -tubulin positive cilia and used the marker to outline the  
919 area of the cilium. We quantified ARL13B immunofluorescence detected by Caspary lab  
920 polyclonal anti-ARL13B antibody (Caspary et al. 2007) and used the same trace to  
921 measure background levels in a different area of the cell body. (B) *Arl13b*<sup>V358A/V358A</sup>  
922 (*A/A*) and *Arl13b*<sup>hnn/hnn</sup> (*hnn*) MEFs treated with control or ciliobrevin-D 0.5% FBS  
923 Media. Samples were overexposed five times longer than normal, saturating the  
924 detector in the ARL13B channel. We measured no difference in ciliary ARL13B  
925 immunofluorescence between control and ciliobrevin-D treated *Arl13b*<sup>V358A/V358A</sup> and  
926 *Arl13b*<sup>hnn/hnn</sup> MEFs. Data presented as violin plots and analyzed by one-way ANOVA.  
927 Respective number of cilia listed below each plot. Cilia that had ARL13B  
928 immunofluorescent readings above background (\*) are shown in panel D. (C)  
929 Representative images of over exposed *Arl13b*<sup>V358A/V358A</sup> and *Arl13b*<sup>hnn/hnn</sup> MEFs in

930 control and ciliobrevin-D treatment conditions. (D) Representative images of cilia with  
931 ARL13B levels above background, marked by \* in panel B.

932

### Figure 3 – Supplement 1

933 **Endogenous ARL13B is undetectable in the cell body of cilia mutant *IFT172<sup>wim</sup>***  
934 **cells.**

935 Immunofluorescent detection of ARL13B (cyan; NeuroMab) and cilia marker acetylated  
936  $\alpha$ -tubulin (magenta) in wildtype, *Arl13b<sup>hnn</sup>*, *IFT172<sup>wim</sup>*, and *IFT172<sup>wim</sup> Arl13b<sup>hnn</sup>* cell lines.

937 (A) In wildtype cells, ARL13B is detectable in the cilium under non-saturating conditions,  
938 these parameters are kept constant across all samples. (B) In *IFT172<sup>wim</sup>* non-ciliated  
939 cells, ARL13B protein is confined to the cell body, but is nearly undetectable by  
940 standard immunofluorescence. (C-D) In *Arl13b<sup>hnn</sup>* and *IFT172<sup>wim</sup> Arl13b<sup>hnn</sup>* cells, null for  
941 *Arl13b*, any signal is due primary antibody background. At an exposure rate 4x above  
942 normal the ARL13B signal saturates the detector in wildtype cells. In *IFT172<sup>wim</sup>* cells,  
943 overexposure reveals no ARL13B positive stain that is above the background detected  
944 in *Arl13b<sup>hnn</sup>* and *IFT172<sup>wim</sup> Arl13b<sup>hnn</sup>* cells. Images taken at 40x. Scale bar is 5  $\mu$ m.

945 Experiments repeated in duplicate and examined 4-6 fields of view per condition.

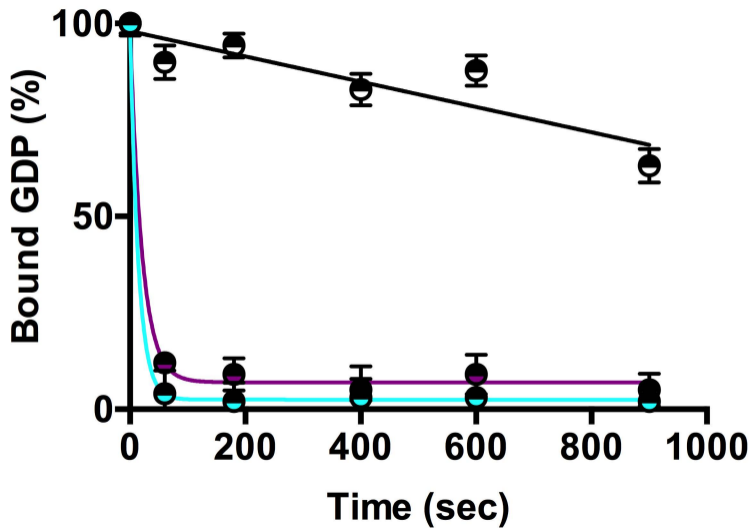

- ARL3
- mArl13b
- mArl13b V358A

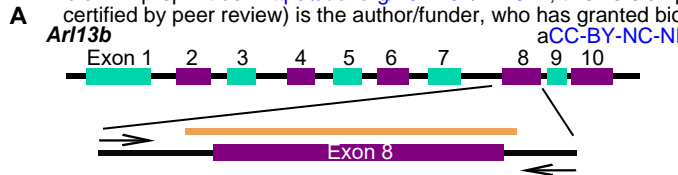

**B**

|          |       |     |     |     |     |     |     |     |     |           |
|----------|-------|-----|-----|-----|-----|-----|-----|-----|-----|-----------|
|          |       | 355 | 356 | 357 | 358 | 359 | 360 | 361 | 362 | 363       |
| wildtype | 5'... | AGT | CAT | CGG | GTA | GAA | CCA | GTC | AAT | ACA ...3' |
|          | ...   | S   | H   | R   | V   | E   | P   | V   | N   | T...      |
| T-to-C   | 5'... | AGT | CAT | CGG | GCA | GAA | CCA | GTC | AAT | ACA ...3' |
|          | ...   | S   | H   | R   | A   | E   | P   | V   | N   | T...      |

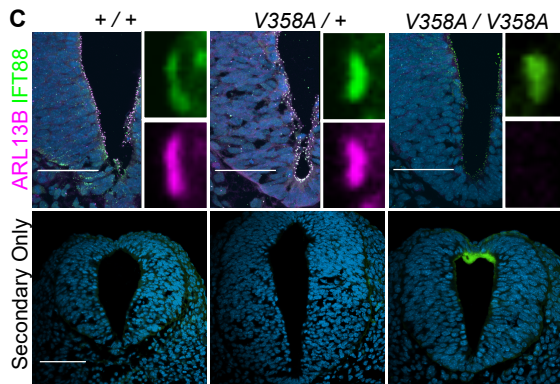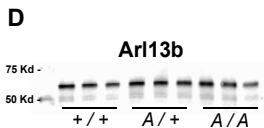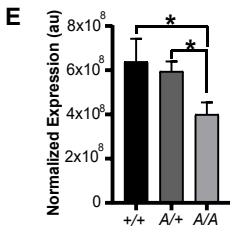

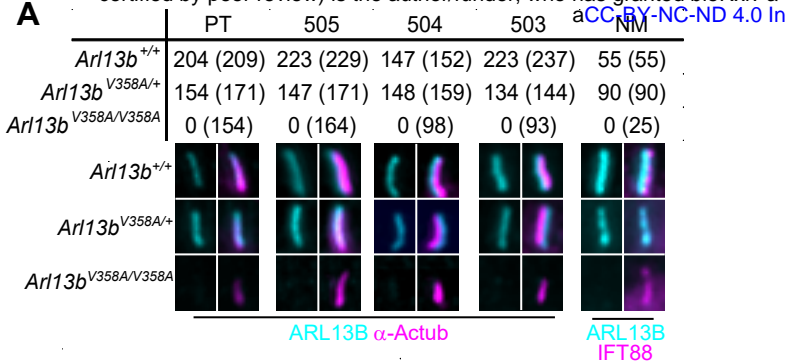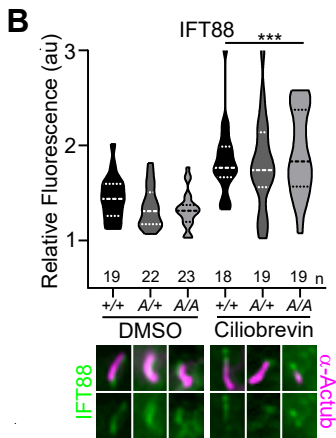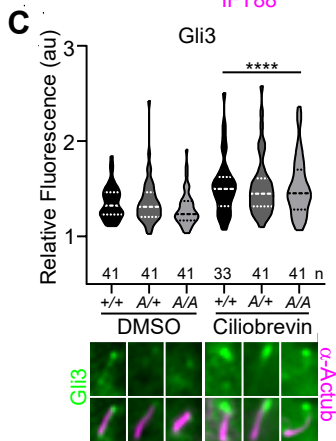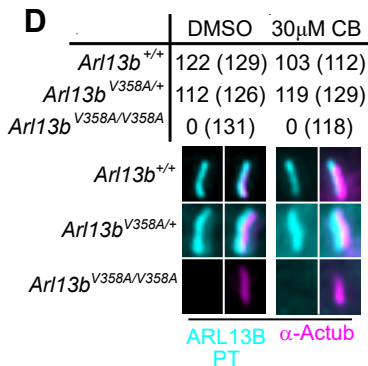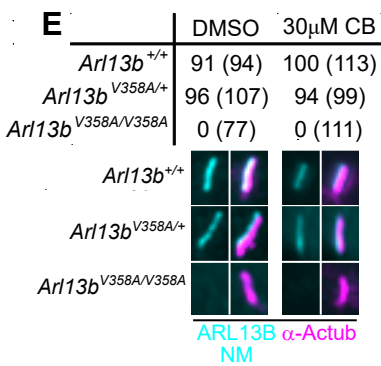



wildtype

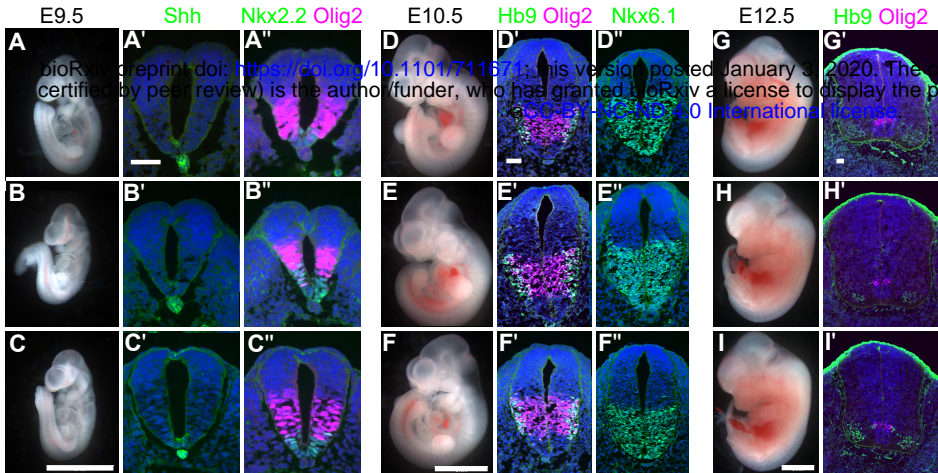

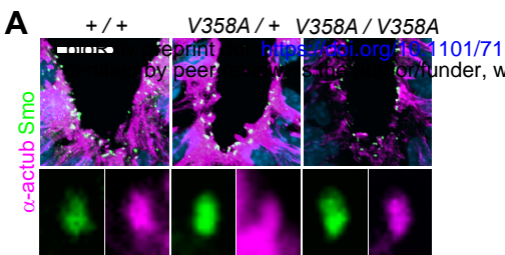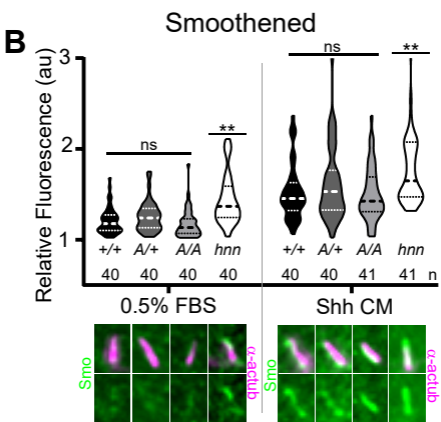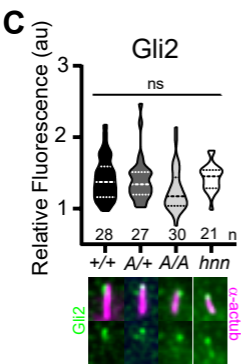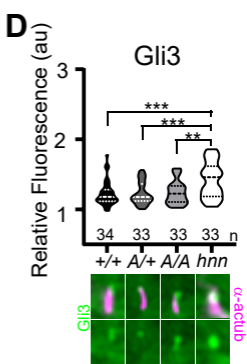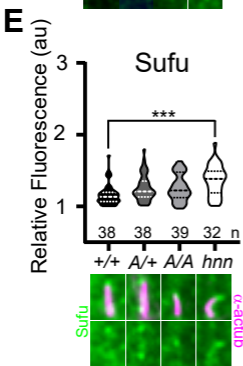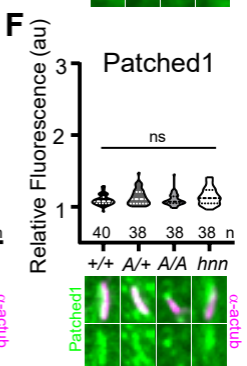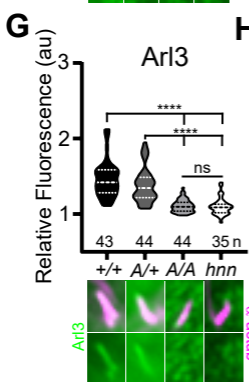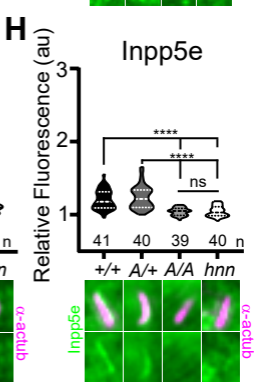

**A**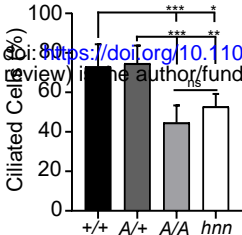**B**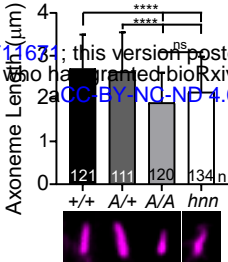

at doi: <https://doi.org/10.1101/711674>; this version posted  
er review) is the author/funder, who has granted bioRxiv  
CC-BY-NC-ND 4.0

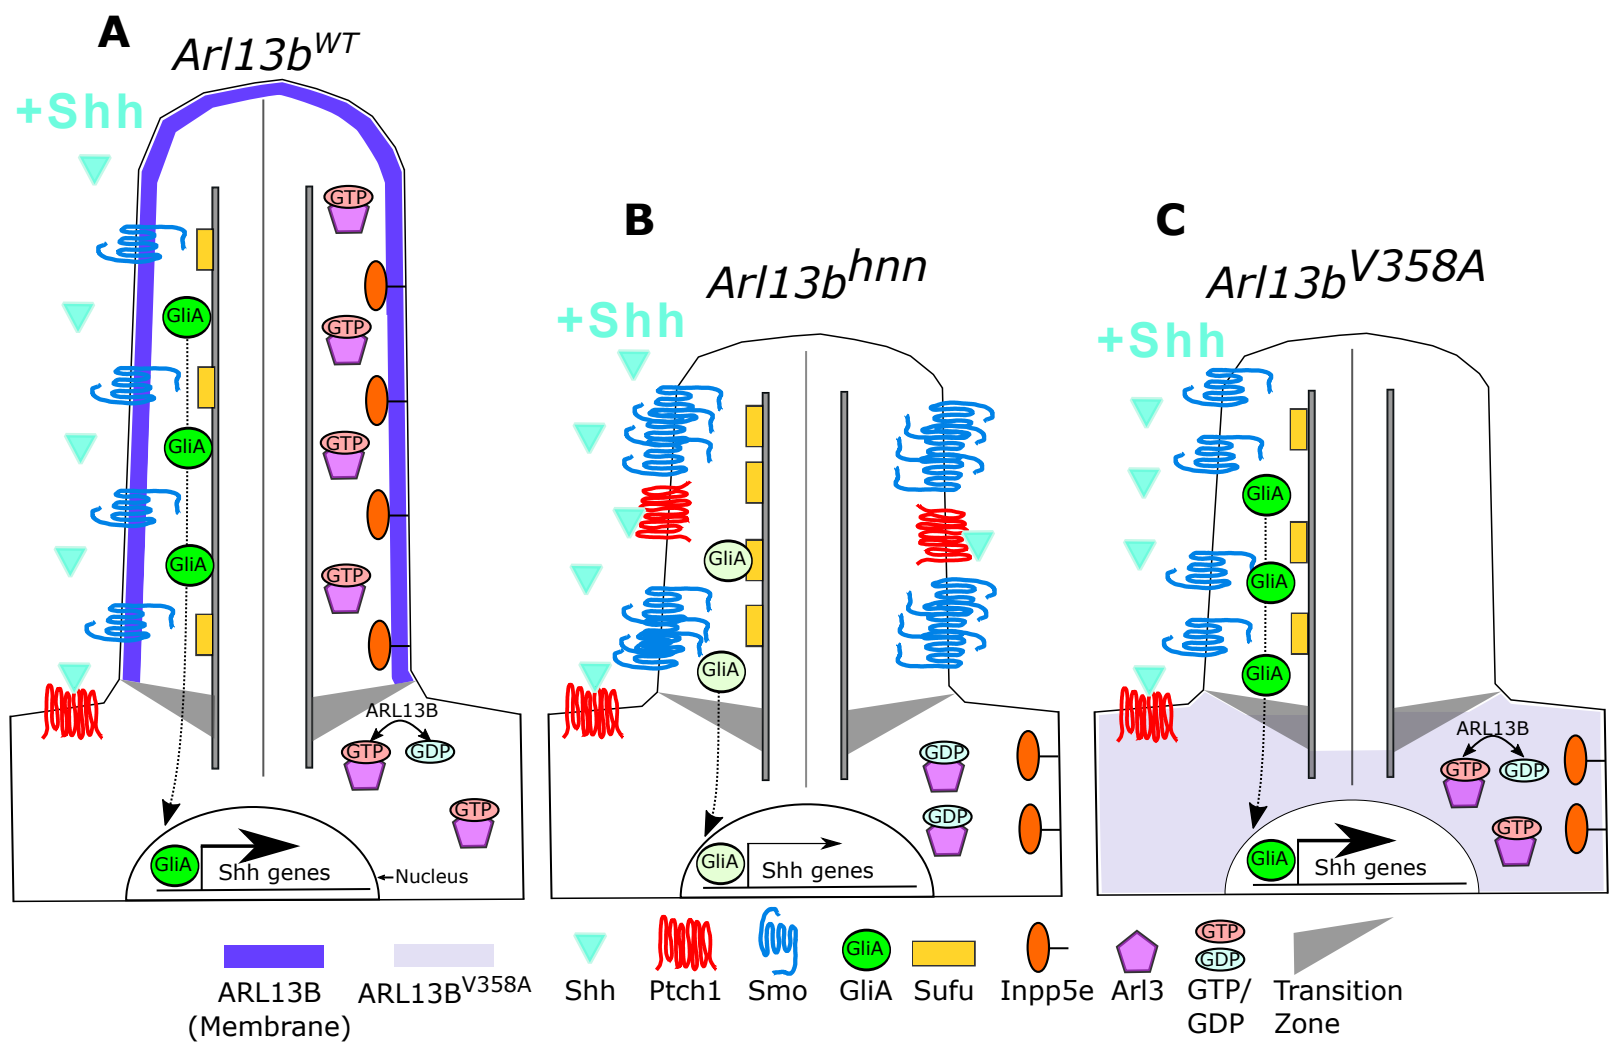

Source: https://www.biorxiv.org/content/10.1101/711671v2.full.pdf
